1 **Inhibition of c-Jun in AgRP neurons mediates chronic stress-induced**  
2 **anxiety-like behaviors and colitis susceptibility**

3

4 Fuxin Jiao<sup>2</sup>, Xiaoming Hu<sup>1</sup>, Hanrui Yin<sup>2</sup>, Feixiang Yuan<sup>1</sup>, Ziheng Zhou<sup>2</sup>, Wei Wu<sup>3</sup>,  
5 Shanghai Chen<sup>1</sup>, Zhanju Liu<sup>3,\*</sup>, Feifan Guo<sup>1,\*</sup>

6

7 <sup>1</sup>Zhongshan Hospital, State Key Laboratory of Medical Neurobiology, Institute for  
8 Translational Brain Research, MOE Frontiers Center for Brain Science, Fudan  
9 University, Shanghai 200032, China.

10 <sup>2</sup>CAS Key Laboratory of Nutrition, Metabolism and Food Safety, Innovation Center  
11 for Intervention of Chronic Disease and Promotion of Health, Shanghai Institute of  
12 Nutrition and Health, University of Chinese Academy of Sciences, Chinese Academy  
13 of Sciences, Shanghai 200031, China.

14 <sup>3</sup>Department of Gastroenterology, The Shanghai Tenth People's Hospital, Tongji  
15 University, Shanghai 200072, China

16

17 \*Correspondence: Feifan Guo, PhD, Zhongshan Hospital, State Key Laboratory of  
18 Medical Neurobiology, Institute for Translational Brain Research, MOE Frontiers  
19 Center for Brain Science, Fudan University, Shanghai 200032, China. e-mail:  
20 ffguo@fudan.edu.cn; fax: +86-21-54237683. Zhanju Liu, MD, PhD, Department of  
21 Gastroenterology, The Shanghai Tenth People's Hospital, Tongji University, Shanghai  
22 200072, China. e-mail: liuzhanju88@126.com; fax: +86-21-66303983.

23

24 **ABSTRACT**

25       Psychiatric disorders, such as anxiety, are frequently associated with  
26 inflammatory bowel diseases (IBD), however, the neural mechanisms are unknown.  
27 Here, we showed that hypothalamic agouti-related protein (AgRP) neuronal activity  
28 was suppressed under chronic restraint stress (CRS), a condition known to induce  
29 anxiety-like behaviors and increase colitis susceptibility. Consistently, chemogenic  
30 activation (inhibition) of AgRP neurons reversed (mimicked) CRS-induced anxiety-  
31 like behaviors and colitis susceptibility. Furthermore, CRS inhibited AgRP neuronal  
32 activity by suppressing the expression of c-Jun. As expected, overexpression of c-Jun  
33 in these neurons protected against the CRS-induced these effects and knockdown of c-  
34 Jun in AgRP neurons (*c-Jun*<sup>ΔAgRP</sup>) promoted anxiety-like behaviors and colitis.  
35 Moreover, relieving the anxiety with cyamemazine (an anxiolytic drug) alleviated  
36 colitis susceptibility in *c-Jun*<sup>ΔAgRP</sup> mice. Finally, according to a proteomic analysis, the  
37 levels of the secreted protein thrombospondin 1 (THBS1) were negatively associated  
38 with the increased anxiety-like behaviors and colitis susceptibility, supplementing  
39 recombinant THBS1 rescued colitis in *c-Jun*<sup>ΔAgRP</sup> mice. Taken together, these results  
40 reveal a critical role of hypothalamic AgRP neuron-derived c-Jun in orchestrating  
41 chronic stress-induced anxiety-like behaviors and colitis susceptibility. These results  
42 provide a new perspective for understanding the neuronal mechanisms and potential  
43 therapeutic target for the comorbidity of psychiatric disorders, such as anxiety, and  
44 IBD.

45 **Keywords:** AgRP neurons; Anxiety; Brain-gut axis; c-Jun; Inflammatory bowel

46 disease.

47

48

## 49 **Introduction**

50 Psychological disorders, such as anxiety and depression, severely influence  
51 human health (Kalin, 2020). What makes it even worse is that they are frequently  
52 associated with the occurrence of many other diseases, including inflammatory bowel  
53 diseases (IBD) (Kurina et al., 2001; Wang et al., 2020; Xia et al., 2021). Stress is a  
54 common cause of psychiatric disorders (de Kloet et al., 2005) and intestinal  
55 inflammation (Gao et al., 2018; Qiu et al., 1999). Accumulating lines of evidence has  
56 illustrated that brain-gut interactions play an important role in the outcome of  
57 psychological disorders and IBD under stress conditions (Bonaz and Bernstein, 2013;  
58 Gracie et al., 2019). Although gut signals and microbiota are proposed to play roles in  
59 the comorbidity of psychological disorders and intestinal inflammation (Gao et al.,  
60 2018), the neural mechanisms behind stress-induced anxiety and colitis susceptibility  
61 are unknown.

62 The hypothalamus is an important neural control center in the regulation of the  
63 stress response (Bains et al., 2015), consisting of a series of important nuclei. The  
64 hypothalamic arcuate nucleus (ARC) is critical to the regulation of energy metabolism  
65 (Sohn et al., 2013) and recently reported to be engaged in emotional regulation (Fang  
66 et al., 2021; Qu et al., 2020; Xia et al., 2021). There are two specific populations of  
67 neurons in the ARC: neurons co-expressing the orexigenic neuropeptide agouti-  
68 related protein (AgRP) and neuropeptide Y, and neurons co-expressing the  
69 anorexigenic pro-opiomelanocortin (POMC) precursor and the cocaine- and  
70 amphetamine-related transcript, whereas the AGRP/NPY neurons have an inhibitory

71 effect on the POMC/CART neurons (Bell et al., 2005). Unlike the POMC that is  
72 widely produced in addition to ARC (Harno et al., 2018), neurons expressing AgRP  
73 are localized exclusively in the hypothalamic ARC (Broberger et al., 1998). AgRP  
74 neuronal activity is influenced by stress (Fang et al., 2021), and controls diverse  
75 physiological processes, including feeding (Bell et al., 2005), pain sensation (Alhadeff  
76 et al., 2018) and food-seeking behavior (Dietrich et al., 2015). Studies shows that  
77 AgRP neurons are involved in the regulation of peripheral tissue homeostasis (Joly-  
78 Amado et al., 2012; Kim et al., 2015), suggesting that it may play an important role in  
79 stress-induced anxiety and colitis.

80 c-Jun is a component of the activator protein-1 transcription factor family, which  
81 forms either a homodimer or heterodimer with other members of the family (c-Fos or  
82 ATF) and plays a role in the activation of downstream target genes (Wisdom et al.,  
83 1999). It is expressed in many tissues, including brain (Sakai et al., 1989). c-Jun is  
84 shown to be involved in the regulation of many functions in peripheral tissues (Fuest  
85 et al., 2012; Nateri et al., 2005). By contrast, the role of c-Jun in the brain is poorly  
86 understood, except for some biological processes such as axonal injury (Raivich et al.,  
87 2004) and neurodegeneration (Raivich and Behrens, 2006). Because c-Jun is an  
88 immediate-early gene that is dynamically regulated in response to neuronal activity  
89 (McNeill and Robinson, 2015), it is commonly used as a marker reflecting neuronal  
90 activity (Hoffman et al., 1993). However, it is also induced under stress conditions  
91 (Filipovic et al., 2012) and highly expressed in the hypothalamus arcuate nucleus  
92 (Herdegen et al., 1995), suggesting that it may additionally be involved in the

93 regulation of some important functions in the arcuate nucleus.

94 Based on the above knowledge, we hypothesize that c-Jun in AgRP neurons  
95 plays an important role in the stress-induced comorbidity of anxiety and IBD. This  
96 study investigates such a possibility and explores the likely mechanisms.

97

98

## 99 **Results**

### 100 **Chronic Restraint Stress (CRS) Induces Anxiety-Like Behaviors and Increases** 101 **Susceptibility to Colitis**

102 To induce anxiety and colitis, we employed a CRS mouse model (Supplementary  
103 information Fig. S1A) as described previously (Gao et al., 2018; Liu et al., 2020;  
104 McGill et al., 2006), which significantly reduced body weight, elevated adrenal gland  
105 weight and serum corticosterone levels compared with control treatment  
106 (Supplementary information Fig. S1B-D). As shown previously (Liu et al., 2020),  
107 CRS induced anxiety-like behaviors, as demonstrated by the significantly reduced  
108 time and travel distance in the central region in the open field (OF) test, and the  
109 shorter time and fewer entries to the open arms in the elevated plus maze (EPM) test  
110 (Supplementary information Fig. S1E and F). In addition, the CRS mice exhibited a  
111 greater extent of dextran sodium sulfate (DSS)-induced colitis, as evaluated by the  
112 loss of body weight, gross bleeding, and shortening of colon length, as well as  
113 histological analysis revealing epithelial damage and lymphocyte infiltration of the  
114 distal colon (Supplementary information Fig. S1G-J). Consistently, the mRNA levels

115 of proinflammatory cytokines (*interleukin (IL) 6 (Il6), Il1b, Il12*, and *transforming*  
116 *growth factor beta (Tgfb)* (Tian et al., 2019) were significantly increased in the colon  
117 tissues of CRS mice (Supplementary information Fig. S1K). These results suggest  
118 that CRS could induce anxiety-related behaviors and colitis.

119

## 120 **Activation of AgRP Neurons Reverses CRS-increased Anxiety-like behaviors and** 121 **Colitis Susceptibility**

122 To investigate the involvement of AgRP neurons in CRS-induced effects, we  
123 conducted immunofluorescence (IF) staining for c-Fos, a signal reflecting neuronal  
124 activity (Krashes et al., 2011), in the AgRP-Cre-Ai9 mice. IF staining of tdTomato  
125 (reflecting AgRP neurons) and c-Fos revealed decreased c-Fos levels in the AgRP  
126 neurons of CRS mice (Supplementary information Fig. S2A), suggesting inhibited  
127 AgRP neuronal activity. If the inhibited AgRP neurons were important in this case,  
128 stimulating AgRP neurons by an excitatory DREADD receptor hM3Dq (Krashes et al.,  
129 2013), should reverse the CRS-increased susceptibility to anxiety and colitis. As  
130 predicted, stimulation of AgRP neurons (as shown by the increased c-Fos staining,  
131 Supplementary information Fig. S2B and C) reversed CRS-induced anxiety-like  
132 behaviors with an increase in both center time duration and center distance in the OF  
133 test (Fig. 1A), and an increase in time and entries into the open arms in the EPM test  
134 (Fig. 1B). Furthermore, the activation of AgRP neurons also reversed chronic stress-  
135 increased susceptibility to DSS-induced colitis, as demonstrated by its blocking  
136 effects on the CRS-induced loss of body weight, increased bleeding score, shortened

137 colon length, higher histological scores, and increased expression of proinflammatory  
138 factors (*Il6*, *Il1b*, *Il12*, and *Tgfb*) (Fig. 1C-G, Supplementary information Fig. S2D).  
139 Although activation of AgRP neuron has a significant impact on feeding behavior  
140 (Krashes et al., 2011), the effect of colitis-related findings was not due to food intake  
141 as shown by pair-fed experiments (Supplementary information Fig. S3A-E). These  
142 results suggest that activation of AgRP neurons enables to reverse anxiety-related  
143 behaviors and colitis induced by CRS.

144

#### 145 **Inhibition of AgRP Neurons Promotes Anxiety-Like Behaviors and Colitis**

146 To further confirm the role of AgRP neurons in anxiety and colitis, we  
147 investigated the phenotypes in mice with inhibition of AgRP neurons, using an  
148 inhibitory hM4Di designer receptor exclusively activated by designer drugs  
149 (DREADDs) (Krashes et al., 2011), as reflected by the reduced c-Fos  
150 immunoreactivity in AgRP neurons (Supplementary information Fig. S4A and B).  
151 Interestingly, inhibition of AgRP neurons decreased the center distance and center  
152 time in the OF test, and the number of entries and time spent in the open arms in the  
153 EPM test, indicating increased anxiety-like behaviors (Fig. 2A and B). Moreover,  
154 mice with inhibited neuronal activity of the AgRP were more sensitive to DSS-  
155 induced colitis, characterized by a more severe weight loss, gross bleeding, shortened  
156 colon length, higher histological scores, and increased pro-inflammatory cytokine  
157 levels (*Il6*, *Il1b*, *Il12*, and *Tgfb*), compared with control mice (Fig. 2C-G,  
158 Supplementary information Fig. S4C). Collectively, these results indicate that



159 inhibition of AgRP neurons mimics stress-induced anxiety-like behaviors and colitis.

160

161 **Overexpression of c-Jun in AgRP Neurons Confers Resistance to CRS-Induced**  
162 **Anxiety-Like Behaviors and Colitis Susceptibility**

163 We then explored the possible involvement of c-Jun in the CRS-induced effects  
164 and found that the activity of AgRP neurons decreased through c-Jun ablation and  
165 increased through c-Jun overexpression both *in vivo* and *in vitro* (Supplementary  
166 information Fig. S5A-D). IF staining confirmed a decrease in c-Jun protein levels in  
167 the AgRP neurons of stressed mice (Supplementary information Fig. S6A). If the  
168 reduced c-Jun expression was important under stress, the activation of c-Jun in AgRP  
169 neurons should be expected to ameliorate CRS-induced effects. To test this possibility,  
170 we overexpressed c-Jun in AgRP neurons by injecting AAVs expressing c-Jun into the  
171 AgRP-irs-Cre mice (Supplementary information Fig. S6B and C). As predicted, mice  
172 with c-Jun overexpression were resistant to CRS-induced weight loss and colon  
173 shortening (Supplementary information Fig. S6D and E). Consistently, overexpressed  
174 groups spent more time and distance in the center as evaluated in the OF test  
175 compared with the control group after CRS (Supplementary information Fig. S6F).  
176 Similarly, in the EPM test, groups with overexpressed c-Jun had more entries to the  
177 open arm (Supplementary information Fig. S6G). Stressed c-Jun-overexpressing mice  
178 were more resistant to DSS-induced body weight loss compared with stressed control  
179 mice (Supplementary information Fig. S6H and I). The diarrhea scores and colon  
180 length were also relieved in the overexpressed group (Supplementary information Fig.

181 S6J and K). Furthermore, signs of colon colitis were markedly ameliorated in mice  
182 with overexpressed c-Jun, as evidenced by the decreased epithelial damage and  
183 lymphocyte infiltration, as well as reduced mRNA expression of inflammatory  
184 cytokines (Supplementary information Fig. S6L and M). These data indicate that  
185 overexpression of c-Jun in AgRP neurons protected the mice from CRS-induced  
186 anxiety and colitis.

187

### 188 **Deletion of c-Jun in AgRP Neurons Facilitates Anxiety-Like Behaviors and** 189 **Colitis**

190 To further confirm the role of c-Jun in AgRP neurons, we generated mice with c-  
191 Jun knockdown in AgRP neurons (*c-Jun*<sup>ΔAgRP</sup>), as confirmed by the reduced c-Jun  
192 expression in AgRP neurons (Supplementary information Fig. S7A). The  
193 corticosterone concentration was significantly higher in the sera of *c-Jun*<sup>ΔAgRP</sup> mice  
194 than in control mice, suggesting increased stress (Supplementary information Fig.  
195 S7B). Moreover, the body weight of *c-Jun*<sup>ΔAgRP</sup> mice was slightly lower than that of  
196 control mice (Supplementary information Fig. S7C). Although the classic function of  
197 AgRP neurons is to regulate food intake, we did not detect any difference in the  
198 change of food intake in *c-Jun*<sup>ΔAgRP</sup> mice (Supplementary information Fig. S7D).

199 The *c-Jun*<sup>ΔAgRP</sup> mice displayed obvious anxiety-like behaviors, reflected as a  
200 shorter time and less distance in the center in the OF test (Fig. 3A), and fewer entries  
201 and time in the open arms as evaluated in the EPM test (Fig. 3B). The clinical signs of  
202 colitis, including weight loss, rectal bleeding and colon shortening, were more severe

203 in *c-Jun*<sup>ΔAgRP</sup> mice than in controls after DSS treatment (Fig. 3C-E). The epithelial  
204 damage, including mucosal erosion, crypt loss, lymphocyte infiltration, and the  
205 mRNA expression of proinflammatory cytokines were also significantly increased in  
206 the colons of *c-Jun*<sup>ΔAgRP</sup> mice compared with controls (Fig. 3F and G). These data  
207 indicate that deletion of *c-Jun* in AgRP neurons is sufficient to induce anxiety-like  
208 behaviors and colitis susceptibility in the absence of stress.

209

### 210 **Relieving Anxiety with Cyamemazine (CYA) Reverses Colitis in *c-Jun*<sup>ΔAgRP</sup> Mice**

211 To investigate whether stimulated anxiety-like behaviors contributed to the  
212 increased colitis susceptibility, a typical antipsychotic drug CYA has been shown to  
213 block anxiety (Benyamina et al., 2012), was infused into the third ventricle of *c-*  
214 *Jun*<sup>ΔAgRP</sup> mice for 7 days. The efficacy of the drug was elevated by the changed 5-HT  
215 receptor expression in the ARC (Supplementary information Fig. S8), as CYA is a  
216 potent 5-HT receptors antagonist (Benyamina et al., 2012). Interestingly, we found  
217 that treatment with CYA largely alleviated anxiety-like behaviors in *c-Jun*<sup>ΔAgRP</sup> mice  
218 as demonstrated by the OF and EPM tests (Fig. 4A and B). The signs of colitis  
219 susceptibility were also alleviated in *c-Jun*<sup>ΔAgRP</sup> mice, following evaluation of the  
220 examined parameters (Fig. 4C-G). These data indicate that antipsychotic drug may  
221 influence the development of colitis in mice with co-existing anxiety.

222

### 223 **The Increased Colitis Susceptibility in *c-Jun*<sup>ΔAgRP</sup> mice is Mediated by THBS1**

224 Because the brain conveys the neural, endocrine, and circulatory messages to the

225 gut (Bonaz and Bernstein, 2013; Gracie et al., 2019; Mawdsley and Rampton, 2005),  
226 to elucidate the underlying mechanisms of the observed effects, we conducted mass  
227 spectrometry to explore the possible secreted proteins in the sera of the mice with *c-*  
228 Jun overexpression and control groups with or without CRS under colitis conditions.  
229 We identified 22 secreted proteins that significantly differed in abundance between  
230 the three groups (Fig. 5A and B; Supplementary information Table S2-3). Among  
231 these proteins, we focused on thrombospondin 1 (THBS1), which showed the most  
232 dramatic change and is well known for its anti-angiogenic and anti-inflammatory  
233 properties (Adams and Lawler, 2011). The secreted levels of THBS1 were  
234 significantly reduced after CRS and notably increased after *c-Jun* rescue in AgRP  
235 neurons (Supplementary information Fig. S9A-C). Moreover, the serum levels of  
236 THBS1 were reduced in *c-Jun*<sup>ΔAgRP</sup> mice (Fig. 5C) and increased by treatment with  
237 CYA (Supplementary information Fig. S9D), indicating it may have potential role in  
238 linking anxiety and colitis. To test this hypothesis, we treated *c-Jun*<sup>ΔAgRP</sup> mice with  
239 THBS1 (Bai et al., 2020) and found that it markedly alleviated colitis, as shown by  
240 the resistant effects on the corresponding changes in the body weight loss, bleeding  
241 score, colon length, colon histochemical analysis, and the expression of pro-  
242 inflammatory factors (Fig. 5D-H). These results suggest that THBS1 suppresses  
243 intestinal mucosal inflammation and may serve as a potential biomarker for stress-  
244 induced colitis.

245

246

## 247 **Discussion**

248       The brain-gut axis serves as a circuit that incorporates the state of mind and gut  
249 signals that ultimately determine the intestinal function (Bonaz and Bernstein, 2013;  
250 Gracie et al., 2019; Mawdsley and Rampton, 2005; Wu et al., 2014). Therefore, the  
251 changes of brain functions are closely related to gut metabolism abnormalities (Bonaz  
252 and Bernstein, 2013; Lee et al., 2021; Mawdsley and Rampton, 2005). Accumulating  
253 evidence indicates that mood disorders, such as anxiety or depression, often co-occur  
254 with IBD (Blackwell et al., 2021; Gracie et al., 2018; Koloski et al., 2012; Kurina et  
255 al., 2001). Several brain areas, including the hypothalamus, hippocampus and  
256 amygdala, are involved in anxiety-related behaviors (Adhikari et al., 2010; Bains et al.,  
257 2015; Liu et al., 2020). The AgRP neurons in the hypothalamic ARC particularly have  
258 gained much attention since more important functions of this neuron were discovered,  
259 such as feeding, pain sensation and depression-related behaviors (Alhadeff et al., 2018;  
260 Bell et al., 2005; Fang et al., 2021). However, a role of AgRP neurons in the  
261 comorbidity of anxiety and colitis has not been reported.

262       In current study, we used CRS model and chemogenic strategy to investigate the  
263 possible involvement of AgRP neurons in stress-induced anxiety and colitis. We found  
264 that AgRP neuronal activity was inhibited by CRS. However, in another study under  
265 stressed model, AgRP neurons were not affected (Qu et al., 2020). The different  
266 response may be attributable to the variation in the duration of treating the mice (4  
267 hours per day in our work versus 1 hour per day in their study), which is likely to  
268 result in different levels of stress. The significance of the inhibited AgRP neurons in

269 CRS was further confirmed by gain- and loss-of AgRP neuron function experiments.  
270 To our knowledge, this is the first to demonstrate that convergent regulation of colitis  
271 and stress is integrated in the AgRP neurons in the ARC, providing important  
272 evidence that psychiatric disorders, such as anxiety, may influence colitis through  
273 central neuronal activity in the ARC. Moreover, though some mechanisms are  
274 proposed for IBD (Molodecky et al., 2012), the neuronal signals are largely unknown.  
275 Our results provide new perspective for understanding the neuronal regulation for  
276 IBD. In addition, another study shows that inhibition of AgRP neuron causes  
277 depression (Fang et al., 2021), another type of psychiatric disorder (de Kloet et al.,  
278 2005), suggesting that AgRP neurons might also play an important role in other  
279 psychiatric disorders, as well as diseases related to them. As a number of studies have  
280 shown that AgRP neurons facilitate food-seeking behavior (Aponte et al., 2011;  
281 Krashes et al., 2011), it remains to be tested whether the role of Agrp neurons in  
282 anxiety-like behaviors is influenced by the behaviors driven by feeding. However, the  
283 increased food intake did not contribute to the improvement of colitis as evaluated by  
284 pair-fed experiments in current study.

285 We then explored the specific neural molecules regulating stress-induced anxiety  
286 and colitis. We found that the expression of the stress-related gene c-Jun was  
287 decreased in AgRP neurons under CRS conditions and that knockdown of c-Jun in  
288 AgRP neurons mimicked the effect of CRS but reversed these after overexpression of  
289 c-Jun. These results demonstrate a novel regulatory role of the central c-Jun in stress-  
290 induced anxiety and colitis and provide a potential therapeutic approach for the

291 treatment of these diseases. However, it is unclear how c-Jun inhibited neuronal  
292 activity under stress. Considering that c-Jun plays a role in the regulation of neuron  
293 injury and in the promotion of axon regeneration (Raivich et al., 2004), we speculated  
294 that stress may lead to the damage of AgRP neurons, thus leading to a change in  
295 neuronal activity. However, this possibility requires further investigation.

296 Moreover, we provided important evidence that anxiety may influence colitis  
297 susceptibility by using anxiolytic drug, as well as the possibility for the treatment of  
298 IBD with co-existing anxiety. To gain further insights into how anxiety influences  
299 colitis, we performed proteomic analysis and serum measurement and found that the  
300 levels of secreted protein THBS1 were decreased by CRS in a c-Jun dependent  
301 manner, suggesting that it may function as downstream in linking c-Jun regulated  
302 anxiety and colitis. Thrombospondins are a family of extracellular matrix proteins,  
303 which were first identified in platelets stimulated with thrombin (Baenziger et al.,  
304 1971). After treatment with DSS, THBS1-deficient mice show a higher level of crypt  
305 damage and deeper lesions, which are reversed by treatment with a THBS1 mimetic  
306 peptide (Punekar et al., 2008). The importance of THBS1 in mediating anxiety-  
307 associated colitis was confirmed by the reversal effect of recombinant THBS1 on  
308 colitis in *c-Jun*<sup>ΔAgRP</sup> mice. Because THBS1 levels were correspondingly changed with  
309 the status of anxiety and colitis, suggesting that it might be used as a biomarker for  
310 the comorbidity of these diseases. However, it remains unclear for the source of  
311 secreted THBS1 protein in the sera, as THBS1 can be produced and secreted into the  
312 extracellular space of many cell types, including the activated endothelium, intestinal

313 epithelial cells, and astrocytes (Adams and Lawler, 2011; Christopherson et al., 2005;  
314 Fang et al., 2015). In addition, the sympathetic nerve and the vagus nerve, which have  
315 been shown to be important mediators of central nervous system outputs to the  
316 peripheral tissues (Bonaz and Bernstein, 2013; Ghia et al., 2008), may also be  
317 involved in the regulation of anxiety-promoted colitis susceptibility. These questions  
318 remain for future investigation.

319 Interestingly, we found that chemogenic manipulation or c-Jun knockdown-  
320 induced inhibition of AgRP neurons promotes anxiety-like behaviors and colitis in the  
321 absence of stressor, suggesting that signals inhibited AgRP neurons may be potential  
322 target for the treatment of anxiety and/or colitis. Therefore, our results are also  
323 important for understanding the mechanisms for those without obvious stress but  
324 present with the comorbidity of psychiatric disorders and IBD.

325 In summary, our present findings revealed that AgRP neuronal activity in the  
326 ARC is an important link between anxiety-like behavior and intestinal inflammation  
327 (Fig. 5I). The importance of these findings is that we have uncovered the specific  
328 neurons and signals in the brain underlying the regulation of the anxiety and colitis  
329 comorbidity. Our results provide evidence that CRS-induced anxiety and colitis is  
330 mediated through an unexpected neurons AgRP neurons. Moreover, we demonstrated  
331 c-Jun as a target in AgRP neuron for stress-induced anxiety and colitis. Furthermore,  
332 we identified the secreted protein Thbs1 function in linking anxiety and colitis and as  
333 a biomarker for anxiety-colitis comorbidity. These results provide a new perspective  
334 for exploring the brain in the regulation of intestinal inflammation homeostasis, and



335 further provide a new central target for the therapeutic intervention of stress-induced  
336 psychiatric disorders and intestinal metabolism dysfunction.

337

338

## 339 **Materials and Methods**

### 340 **Mice and Treatment**

341 Adult male C57BL/6 wild-type (WT) mice were purchased from Shanghai  
342 Laboratory Animal Co., Ltd. (Shanghai, China). *c-Jun*<sup>loxP/loxP</sup> mice (generously  
343 provided by Dr. Erwin F. Wagner, Cancer Cell Biology Program, Spanish National  
344 Cancer Research Center) were crossed with mice expressing Cre recombinase under  
345 control of the AgRP promoter to generate *c-Jun*<sup>ΔAgRP</sup> mice. The efficiency of AgRP-  
346 specific *c-Jun* deletion was evaluated by mating Ai9 (tdTomato) reporter mice  
347 (Madisen et al., 2010) with transgenic mice expressing Cre under control of the AgRP  
348 promoter (AgRP-irs-Cre mice), both obtained from Jackson Laboratory (Bar Harbor,  
349 ME, USA). Transgenic mice and their littermates were used in experiments at the  
350 indicated ages. Mice were subcutaneously injected with recombinant human  
351 thrombospondin 1 (THBS1) protein (0.5 mg/kg per day; Novoprotein Scientific Inc.,  
352 Shanghai, China) (Bai et al., 2020) or vehicle (phosphate-buffered saline) for the  
353 indicated period. To study the effect of anxiolytic drug on anxiety and colitis,  
354 cyamemazine (0.25 ug/side, MCE) (Xia et al., 2021) were i.c.v. administrated.

355 Mice were maintained under controlled temperature (23°C), humidity (50–60%),  
356 and illumination (12-h light/12-h dark cycle), and provided *ad libitum* access to food

357 and water. All animal experiments were conducted in accordance with the guidelines  
358 of the Institutional Animal Care and Use Committee of Shanghai Institute for  
359 Nutritional Sciences, Chinese Academy of Sciences.

360

### 361 **Chronic Restraint Stress (CRS) Model**

362 The CRS mouse model was performed as described previously (Gao et al., 2018;  
363 Liu et al., 2020). In brief, the mice were individually placed in a 50-mL  
364 polypropylene conical tube with multiple holes for ventilation and were restrained to  
365 prevent back-and-forth movement. Restraint was applied for 4 h per day from 10:00  
366 a.m. to 2:00 p.m. for the number of days indicated.

367

### 368 **Colitis Model Establishment**

369 To establish the dextran sulfate sodium (DSS)-induced colitis model, the  
370 drinking water of the mice was supplemented with 3% (w/v) DSS (40 kDa; Aladdin,  
371 Shanghai, China) as described previously (Tian et al., 2019), and the colon length was  
372 determined at the end of the experiments. Diarrhea scores were assessed as described  
373 previously (Rachmilewitz et al., 2002).

374

### 375 **Stereotaxic Surgery and Viral Injections**

376 Surgery was performed as reported previously (Yuan et al., 2020) with a  
377 stereotaxic frame (Stoelting, Wood Dale, IL, USA). Viral injection coordinates (in mm,  
378 midline, bregma, dorsal surface) are as follows: for ARC ( $\pm$  0.3, 1.5, 5.9), for the third

379 ventricle (0, 1.5, 5.6) (Deng et al., 2017; Xia et al., 2021). To rescue the expression of  
380 *c-Jun* specifically localized in AgRP neurons, AgRP-irs-Cre mice were bilaterally  
381 injected with 300 nL of a Cre-dependent adeno-associated virus (AAV) vector  
382 containing *c-Jun* in the opposite orientation flanked by two inverted loxP sites  
383 [AAV9-EF1a-DIO-*c-Jun*-mCherry,  $2.5 \times 10^{12}$  particle-forming units (PFU)/mL] into  
384 the ARC, or with an AAV vector containing only mCherry in the opposite orientation  
385 flanked by two inverted loxP sites (AAV9-EF1a-DIO-mCherry,  $2.5 \times 10^{12}$  PFU/mL)  
386 as controls.

387

### 388 **Designer Receptor Exclusively Activated by Designer Drugs (DREADDs)**

389 To inhibit AgRP neuronal activity, AgRP-irs-Cre mice were stereotaxically  
390 injected with 300 nL of a Cre-dependent AAV encoding an inhibitory DREADD  
391 GPCR (hM4Di) (AAV9-EF1a-DIO-hM4Di-mCherry,  $8 \times 10^{12}$  PFU/mL) or an AAV  
392 encoding only mCherry (AAV9-EF1a-DIO-mCherry,  $7 \times 10^{12}$  Pfu/mL) as controls,  
393 bilaterally into the ARC.

394 For chemogenetic activation of AgRP neurons, AgRP-irs-Cre mice were  
395 stereotaxically injected with 300 nL of a Cre-dependent AAV encoding an excitatory  
396 DREADD GPCR (hM3Dq) (AAV9-EF1a-DIO-hM3D(Gq)-mCherry,  $3 \times 10^{12}$   
397 PFU/mL) or an AAV encoding only mCherry (AAV9-EF1a-DIO-mCherry,  $3 \times 10^{12}$   
398 PFU/mL) as controls, bilaterally into the ARC. After 3 weeks of recovery, all mice  
399 were then intraperitoneally injected with clozapine N-oxide (CNO)  
400 (MedChemExpress, NJ, USA) at 0.3 mg/kg of body weight for hM4Di (Krashes et al.,

401 2011) silencing and for hM3Dq activation (Krashes *et al.*, 2013) every 12 h for  
402 indicated days.

403

#### 404 **Isolation and Treatment of Primary Hypothalamic Neurons**

405 The mouse primary cultures of hypothalamic neurons were referred as previously  
406 described (Deng *et al.*, 2018). sh-c-Jun and c-Jun over-expressed (pCMV-c-Jun)  
407 plasmid were transfected into cells using lipofectamine 3000 reagent (Invitrogen;  
408 Carlsbad, CA, USA) according to the manufacturer's recommendation. The shRNA  
409 sequence for mouse c-Jun was 5'-GCTAACGCAGCAGTTGCAAAC-3'.

410

#### 411 **Open Field (OF) Test**

412 The OF test was performed as in previous studies (Fan *et al.*, 2019; Liu *et al.*,  
413 2020). In brief, a white open field box (50 × 50 × 50 cm; length × width × height) was  
414 divided into a center field (25 × 25 cm) and a periphery field for analysis purposes.  
415 The track was analyzed using LabState (AniLab) by recognizing the central body  
416 point of the mouse throughout a 10-min session. Less time and locomotion spent in  
417 the center of the box were interpreted as anxiety-like behaviors.

418

#### 419 **Elevated Plus Maze (EPM) Test**

420 The EPM test was performed as previously described (Fan *et al.*, 2019; Liu *et al.*,  
421 2020). The elevated plus maze made of plastic and consisted of two white open arms  
422 without walls and two white enclosed arms with walls (25-cm long, 5-cm wide, 15-

423 cm high). The maze was placed 60 cm above the floor. Mice were introduced into the  
424 center quadrant with their back facing an open arm. The ANY-maze video tracking  
425 system (Anilab) was used to track and analyze the time of mice spent in the open arms  
426 and their entries into the open arms throughout a 10-min session. Anxiety was  
427 evaluated by fewer movements into the open arms and less time spent there.

428

#### 429 **RNA Isolation and Quantitative Real-time (qRT)-PCR**

430 RNA extraction and qRT-PCR were performed as described previously (Deng et  
431 al., 2018). The primer sequences used in this study are provided in Supplementary  
432 information, Table S1

433

#### 434 **Histological Scoring**

435 Histological scoring was performed as described previously (Hu et al., 2019).  
436 Hematoxylin and eosin (H&E)-staining of colonic tissue sections were scored in a  
437 blinded fashion for determining the degree of inflammation and tissue damage on  
438 separate scales from 0 to 6.

439

#### 440 **Serum Measurements**

441 The proteomics was performed by the serum after removing common high-abundance  
442 protein through using a Thermo Fisher's serum High Abundance protein removal reagent  
443 (High Select™ Top14 Abundant Protein Depletion Mini Spin Columns, A36370,  
444 Thermo fisher, US). The mass spectrometer Thermo Scientific Q Exactive was perfor

445 med for Label-free quantification detection and data was analyzed by Proteome Disco  
446 verer 2.2. The secreted proteins with fold change (FC)  $\geq 1.5$  and p-value  $< 0.05$  were  
447 considered to be differential proteins. Volcano plots were used to filter the proteins of  
448 interest which based on  $\log_2(\text{FC})$  and  $-\log_{10}(\text{P-value})$  of the secreted proteins (Zhu et a  
449 l., 2011). The raw data is available in the link: <https://datadryad.org/stash/share/20xm>  
450 [GKT2z--QNG0ebHfHU8FR8Vy96LuKXe4AhPwHWc4](https://datadryad.org/stash/share/20xm). Serum corticosterone levels  
451 were measured with an enzyme-linked immunosorbent assay (ELISA) kit (ADI-901-0  
452 97; Enzo Life Science, Farmingdale, NY, USA) as described previously (Lee et al., 20  
453 20). The THBS1 levels were measured using an ELISA kit (mlbio, Shanghai, China)  
454 according to the manufacturer's recommendations.

455

#### 456 **Immunofluorescence (IF) Staining**

457 Immunofluorescence staining was performed as described previously (Yuan et al.,  
458 2020) with primary antibodies to c-Jun (1:1000, Cell Signaling Technology, Danvers,  
459 MA, USA) and c-Fos (1:1000, Cell Signaling Technology, mAb2250 or 1:500, Santa  
460 Cruz Biotechnology, Santa Cruz, CA, USA). c-Fos staining was coupled with a TSA  
461 Plus Fluorescein KIT (NEL741001KT, Perkinelmer, Waltham, MA, USA).

462

#### 463 **Statistical Analysis**

464 Experimental data are expressed as the mean  $\pm$  standard error of the mean (SEM)  
465 of the number of tests stated for each experiment. Statistical comparisons were made  
466 using either two-tailed Student's *t* test or two-way analysis of variance, followed by

467 Tukey's multiple comparisons test, as indicated in the figure legends. All statistical  
468 tests were performed using GraphPad Prism, version 8.0 (GraphPad Software, San  
469 Diego, CA, USA). In addition, the individual data points on each graph were shown in  
470 order to reflect the individual variability of the measures. \*P <0.05, \*\*P <0.01.

471

472

### 473 **Acknowledgements**

474 We would like to thank Dr. Erwin F. Wagner (Cancer Cell Biology Program, Spanish  
475 National Cancer Research Center) and Lijian Hui (Chinese Academy of Sciences  
476 Center for Excellence in Molecular Cell Science) for providing c-Jun loxp/loxp mice.

477

### 478 **Author Contributions**

479 Fuxin Jiao, Zhanju Liu and Feifan Guo designed the project and analyzed the data;  
480 Fuxin Jiao, Xiaoming Hu, Hanrui Yin, Feixiang Yuan, Ziheng Zhou performed the  
481 experiments; Fuxin Jiao, Zhanju Liu, and Feifan Guo wrote the manuscript. Wei Wu  
482 and Shanghai Chen provided experimental materials; All authors discussed and  
483 revised the manuscript.

484

### 485 **Conflict of interest**

486 The authors disclose no conflicts.

487

### 488 **Funding**

489 This work is supported by grant from The National Key R&D Program of China  
490 (2018YFA0800600), the National Natural Science Foundation (91957207, 31830044,  
491 81870592, 82170868, 81770852, 81970742, 81970731, 82000764 and 91942312),  
492 and Shanghai leading talent program, CAS Interdisciplinary Innovation Team, Novo  
493 Nordisk-Chinese Academy of Sciences Research Fund (NNCAS-2008-10). Natural  
494 Science Foundation of Shanghai "science and technology innovation action plan"  
495 (21ZR1475900).

496

497

## 498 **References**

- 499 Adams, J.C., and Lawler, J. (2011). The thrombospondins. *Cold Spring Harb Perspect Biol* 3, a009712.  
500 [10.1101/cshperspect.a009712](https://doi.org/10.1101/cshperspect.a009712).
- 501 Adhikari, A., Topiwala, M.A., and Gordon, J.A. (2010). Synchronized activity between the ventral  
502 hippocampus and the medial prefrontal cortex during anxiety. *Neuron* 65, 257-269.  
503 [10.1016/j.neuron.2009.12.002](https://doi.org/10.1016/j.neuron.2009.12.002).
- 504 Alhadeff, A.L., Su, Z., Hernandez, E., Klima, M.L., Phillips, S.Z., Holland, R.A., Guo, C., Hantman, A.W.,  
505 De Jonghe, B.C., and Betley, J.N. (2018). A Neural Circuit for the Suppression of Pain by a Competing  
506 Need State. *Cell* 173, 140-152 e115. [10.1016/j.cell.2018.02.057](https://doi.org/10.1016/j.cell.2018.02.057).
- 507 Aponte, Y., Atasoy, D., and Sternson, S.M. (2011). AGRP neurons are sufficient to orchestrate feeding  
508 behavior rapidly and without training. *Nat Neurosci* 14, 351-355. [10.1038/nn.2739](https://doi.org/10.1038/nn.2739).
- 509 Baenziger, N.L., Brodie, G.N., and Majerus, P.W. (1971). A thrombin-sensitive protein of human platelet  
510 membranes. *Proc Natl Acad Sci U S A* 68, 240-243. [10.1073/pnas.68.1.240](https://doi.org/10.1073/pnas.68.1.240).
- 511 Bai, J., Xia, M., Xue, Y., Ma, F., Cui, A., Sun, Y., Han, Y., Xu, X., Zhang, F., Hu, Z., et al. (2020).  
512 Thrombospondin 1 improves hepatic steatosis in diet-induced insulin-resistant mice and is associated  
513 with hepatic fat content in humans. *EBioMedicine* 57, 102849. [10.1016/j.ebiom.2020.102849](https://doi.org/10.1016/j.ebiom.2020.102849).
- 514 Bains, J.S., Wamsteeker Cusulin, J.I., and Inoue, W. (2015). Stress-related synaptic plasticity in the  
515 hypothalamus. *Nat Rev Neurosci* 16, 377-388. [10.1038/nrn3881](https://doi.org/10.1038/nrn3881).
- 516 Bell, C.G., Walley, A.J., and Froguel, P. (2005). The genetics of human obesity. *Nat Rev Genet* 6, 221-  
517 234. [10.1038/nrg1556](https://doi.org/10.1038/nrg1556).
- 518 Benyamina, A., Naassila, M., and Bourin, M. (2012). Potential role of cortical 5-HT(2A) receptors in the  
519 anxiolytic action of cyamemazine in benzodiazepine withdrawal. *Psychiatry Res* 198, 307-312.  
520 [10.1016/j.psychres.2012.01.009](https://doi.org/10.1016/j.psychres.2012.01.009).
- 521 Blackwell, J., Saxena, S., Petersen, I., Hotopf, M., Creese, H., Bottle, A., Alexakis, C., Pollok, R.C., and  
522 group, P.-I.s. (2021). Depression in individuals who subsequently develop inflammatory bowel disease:



523 a population-based nested case-control study. *Gut* *70*, 1642-1648. 10.1136/gutjnl-2020-322308.

524 Bonaz, B.L., and Bernstein, C.N. (2013). Brain-gut interactions in inflammatory bowel disease.

525 *Gastroenterology* *144*, 36-49. 10.1053/j.gastro.2012.10.003.

526 Broberger, C., Johansen, J., Johansson, C., Schalling, M., and Hokfelt, T. (1998). The neuropeptide

527 Y/agouti gene-related protein (AGRP) brain circuitry in normal, anorectic, and monosodium glutamate-

528 treated mice. *Proc Natl Acad Sci U S A* *95*, 15043-15048. 10.1073/pnas.95.25.15043.

529 Christopherson, K.S., Ullian, E.M., Stokes, C.C., MULLowney, C.E., Hell, J.W., Agah, A., Lawler, J., Mosher,

530 D.F., Bornstein, P., and Barres, B.A. (2005). Thrombospondins are astrocyte-secreted proteins that

531 promote CNS synaptogenesis. *Cell* *120*, 421-433. 10.1016/j.cell.2004.12.020.

532 de Kloet, E.R., Joels, M., and Holsboer, F. (2005). Stress and the brain: from adaptation to disease. *Nat*

533 *Rev Neurosci* *6*, 463-475. 10.1038/nrn1683.

534 Deng, J., Yuan, F., Guo, Y., Xiao, Y., Niu, Y., Deng, Y., Han, X., Guan, Y., Chen, S., and Guo, F. (2017).

535 Deletion of ATF4 in AgRP Neurons Promotes Fat Loss Mainly via Increasing Energy Expenditure.

536 *Diabetes* *66*, 640-650. 10.2337/db16-0954.

537 Deng, Y., Xiao, Y., Yuan, F., Liu, Y., Jiang, X., Deng, J., Fejes-Toth, G., Naray-Fejes-Toth, A., Chen, S., Chen,

538 Y., et al. (2018). SGK1/FOXO3 Signaling in Hypothalamic POMC Neurons Mediates Glucocorticoid-

539 Increased Adiposity. *Diabetes* *67*, 569-580. 10.2337/db17-1069.

540 Dietrich, M.O., Zimmer, M.R., Bober, J., and Horvath, T.L. (2015). Hypothalamic AgRP neurons drive

541 stereotypic behaviors beyond feeding. *Cell* *160*, 1222-1232. 10.1016/j.cell.2015.02.024.

542 Fan, K.Q., Li, Y.Y., Wang, H.L., Mao, X.T., Guo, J.X., Wang, F., Huang, L.J., Li, Y.N., Ma, X.Y., Gao, Z.J., et al.

543 (2019). Stress-Induced Metabolic Disorder in Peripheral CD4(+) T Cells Leads to Anxiety-like Behavior.

544 *Cell* *179*, 864-879 e819. 10.1016/j.cell.2019.10.001.

545 Fang, L.L., Yu, H.Q., Wu, R.J., He, C., Li, M., Yan, H., Li, J.J., Wang, S., Liu, Z.G., Liu, Z.J., and Yang, P.C.

546 (2015). Thrombospondin 1 Modulates Monocyte Properties to Suppress Intestinal Mucosal

547 Inflammation. *J Innate Immun* *7*, 601-611. 10.1159/000398799.

548 Fang, X., Jiang, S., Wang, J., Bai, Y., Kim, C.S., Blake, D., Weintraub, N.L., Lei, Y., and Lu, X.Y. (2021).

549 Chronic unpredictable stress induces depression-related behaviors by suppressing AgRP neuron

550 activity. *Molecular psychiatry*. 10.1038/s41380-020-01004-x.

551 Filipovic, D., Zlatkovic, J., Pavicevic, I., Mandic, L., and Demajo, M. (2012). Chronic isolation stress

552 compromises JNK/c-Jun signaling in rat brain. *J Neural Transm (Vienna)* *119*, 1275-1284.

553 10.1007/s00702-012-0776-0.

554 Fuest, M., Willim, K., MacNelly, S., Fellner, N., Resch, G.P., Blum, H.E., and Hasselblatt, P. (2012). The

555 transcription factor c-Jun protects against sustained hepatic endoplasmic reticulum stress thereby

556 promoting hepatocyte survival. *Hepatology* *55*, 408-418. 10.1002/hep.24699.

557 Gao, X., Cao, Q., Cheng, Y., Zhao, D., Wang, Z., Yang, H., Wu, Q., You, L., Wang, Y., Lin, Y., et al. (2018).

558 Chronic stress promotes colitis by disturbing the gut microbiota and triggering immune system

559 response. *Proc Natl Acad Sci U S A* *115*, E2960-E2969. 10.1073/pnas.1720696115.

560 Ghia, J.E., Blennerhassett, P., and Collins, S.M. (2008). Impaired parasympathetic function increases

561 susceptibility to inflammatory bowel disease in a mouse model of depression. *The Journal of clinical*

562 *investigation* *118*, 2209-2218. 10.1172/JCI32849.

563 Gracie, D.J., Guthrie, E.A., Hamlin, P.J., and Ford, A.C. (2018). Bi-directionality of Brain-Gut Interactions

564 in Patients With Inflammatory Bowel Disease. *Gastroenterology* *154*, 1635-1646 e1633.

565 10.1053/j.gastro.2018.01.027.

566 Gracie, D.J., Hamlin, P.J., and Ford, A.C. (2019). The influence of the brain-gut axis in inflammatory

567 bowel disease and possible implications for treatment. *Lancet Gastroenterol Hepatol* 4, 632-642.  
568 10.1016/S2468-1253(19)30089-5.

569 Harno, E., Gali Ramamoorthy, T., Coll, A.P., and White, A. (2018). POMC: The Physiological Power of  
570 Hormone Processing. *Physiol Rev* 98, 2381-2430. 10.1152/physrev.00024.2017.

571 Herdegen, T., Kovary, K., Buhl, A., Bravo, R., Zimmermann, M., and Gass, P. (1995). Basal expression of  
572 the inducible transcription factors c-Jun, JunB, JunD, c-Fos, FosB, and Krox-24 in the adult rat brain. *J*  
573 *Comp Neurol* 354, 39-56. 10.1002/cne.903540105.

574 Hoffman, G.E., Smith, M.S., and Verbalis, J.G. (1993). c-Fos and related immediate early gene products  
575 as markers of activity in neuroendocrine systems. *Front Neuroendocrinol* 14, 173-213.  
576 10.1006/frne.1993.1006.

577 Hu, X., Deng, J., Yu, T., Chen, S., Ge, Y., Zhou, Z., Guo, Y., Ying, H., Zhai, Q., Chen, Y., et al. (2019). ATF4  
578 Deficiency Promotes Intestinal Inflammation in Mice by Reducing Uptake of Glutamine and Expression  
579 of Antimicrobial Peptides. *Gastroenterology* 156, 1098-1111. 10.1053/j.gastro.2018.11.033.

580 Joly-Amado, A., Denis, R.G., Castel, J., Lacombe, A., Cansell, C., Rouch, C., Kassis, N., Dairou, J., Cani,  
581 P.D., Ventura-Clapier, R., et al. (2012). Hypothalamic AgRP-neurons control peripheral substrate  
582 utilization and nutrient partitioning. *The EMBO journal* 31, 4276-4288. 10.1038/emboj.2012.250.

583 Kalin, N.H. (2020). Novel Insights Into Pathological Anxiety and Anxiety-Related Disorders. *Am J*  
584 *Psychiatry* 177, 187-189. 10.1176/appi.ajp.2020.20010057.

585 Kim, J.G., Sun, B.H., Dietrich, M.O., Koch, M., Yao, G.Q., Diano, S., Insogna, K., and Horvath, T.L. (2015).  
586 AgRP Neurons Regulate Bone Mass. *Cell reports* 13, 8-14. 10.1016/j.celrep.2015.08.070.

587 Koloski, N.A., Jones, M., Kalantar, J., Weltman, M., Zaguire, J., and Talley, N.J. (2012). The brain-gut  
588 pathway in functional gastrointestinal disorders is bidirectional: a 12-year prospective population-  
589 based study. *Gut* 61, 1284-1290. 10.1136/gutjnl-2011-300474.

590 Krashes, M.J., Koda, S., Ye, C., Rogan, S.C., Adams, A.C., Cusher, D.S., Maratos-Flier, E., Roth, B.L., and  
591 Lowell, B.B. (2011). Rapid, reversible activation of AgRP neurons drives feeding behavior in mice. *The*  
592 *Journal of clinical investigation* 121, 1424-1428. 10.1172/JCI46229.

593 Krashes, M.J., Shah, B.P., Koda, S., and Lowell, B.B. (2013). Rapid versus delayed stimulation of feeding  
594 by the endogenously released AgRP neuron mediators GABA, NPY, and AgRP. *Cell Metab* 18, 588-595.  
595 10.1016/j.cmet.2013.09.009.

596 Kurina, L.M., Goldacre, M.J., Yeates, D., and Gill, L.E. (2001). Depression and anxiety in people with  
597 inflammatory bowel disease. *J Epidemiol Community Health* 55, 716-720. 10.1136/jech.55.10.716.

598 Lee, H.S., Lobbstaël, E., Vermeire, S., Sabino, J., and Cleynen, I. (2021). Inflammatory bowel disease  
599 and Parkinson's disease: common pathophysiological links. *Gut* 70, 408-417. 10.1136/gutjnl-2020-  
600 322429.

601 Lee, J.E., Kwon, H.J., Choi, J., Seo, J.S., and Han, P.L. (2020). Aging increases vulnerability to stress-  
602 induced depression via upregulation of NADPH oxidase in mice. *Commun Biol* 3, 292. 10.1038/s42003-  
603 020-1010-5.

604 Liu, W.Z., Zhang, W.H., Zheng, Z.H., Zou, J.X., Liu, X.X., Huang, S.H., You, W.J., He, Y., Zhang, J.Y., Wang,  
605 X.D., and Pan, B.X. (2020). Identification of a prefrontal cortex-to-amygdala pathway for chronic stress-  
606 induced anxiety. *Nature communications* 11, 2221. 10.1038/s41467-020-15920-7.

607 Madisen, L., Zwingman, T.A., Sunkin, S.M., Oh, S.W., Zariwala, H.A., Gu, H., Ng, L.L., Palmiter, R.D.,  
608 Hawrylycz, M.J., Jones, A.R., et al. (2010). A robust and high-throughput Cre reporting and  
609 characterization system for the whole mouse brain. *Nat Neurosci* 13, 133-140. 10.1038/nn.2467.

610 Mawdsley, J.E., and Rampton, D.S. (2005). Psychological stress in IBD: new insights into pathogenic and

611 therapeutic implications. *Gut* 54, 1481-1491. 10.1136/gut.2005.064261.

612 McGill, B.E., Bundle, S.F., Yaylaoglu, M.B., Carson, J.P., Thaller, C., and Zoghbi, H.Y. (2006). Enhanced  
613 anxiety and stress-induced corticosterone release are associated with increased Crh expression in a  
614 mouse model of Rett syndrome. *Proc Natl Acad Sci U S A* 103, 18267-18272.  
615 10.1073/pnas.0608702103.

616 McNeill, M.S., and Robinson, G.E. (2015). Voxel-based analysis of the immediate early gene, c-jun, in  
617 the honey bee brain after a sucrose stimulus. *Insect Mol Biol* 24, 377-390. 10.1111/imb.12165.

618 Molodecky, N.A., Soon, I.S., Rabi, D.M., Ghali, W.A., Ferris, M., Chernoff, G., Benchimol, E.I.,  
619 Panaccione, R., Ghosh, S., Barkema, H.W., and Kaplan, G.G. (2012). Increasing incidence and  
620 prevalence of the inflammatory bowel diseases with time, based on systematic review.  
621 *Gastroenterology* 142, 46-54 e42; quiz e30. 10.1053/j.gastro.2011.10.001.

622 Nateri, A.S., Spencer-Dene, B., and Behrens, A. (2005). Interaction of phosphorylated c-Jun with TCF4  
623 regulates intestinal cancer development. *Nature* 437, 281-285. 10.1038/nature03914.

624 Puneekar, S., Zak, S., Kalter, V.G., Dobransky, L., Puneekar, I., Lawler, J.W., and Gutierrez, L.S. (2008).  
625 Thrombospondin 1 and its mimetic peptide ABT-510 decrease angiogenesis and inflammation in a  
626 murine model of inflammatory bowel disease. *Pathobiology* 75, 9-21. 10.1159/000113790.

627 Qiu, B.S., Vallance, B.A., Blennerhassett, P.A., and Collins, S.M. (1999). The role of CD4+ lymphocytes  
628 in the susceptibility of mice to stress-induced reactivation of experimental colitis. *Nature medicine* 5,  
629 1178-1182. 10.1038/13503.

630 Qu, N., He, Y., Wang, C., Xu, P., Yang, Y., Cai, X., Liu, H., Yu, K., Pei, Z., Hyseni, I., et al. (2020). A POMC-  
631 originated circuit regulates stress-induced hypophagia, depression, and anhedonia. *Molecular*  
632 *psychiatry* 25, 1006-1021. 10.1038/s41380-019-0506-1.

633 Rachmilewitz, D., Karmeli, F., Takabayashi, K., Hayashi, T., Leider-Trejo, L., Lee, J., Leoni, L.M., and Raz,  
634 E. (2002). Immunostimulatory DNA ameliorates experimental and spontaneous murine colitis.  
635 *Gastroenterology* 122, 1428-1441. 10.1053/gast.2002.32994.

636 Raivich, G., and Behrens, A. (2006). Role of the AP-1 transcription factor c-Jun in developing, adult and  
637 injured brain. *Prog Neurobiol* 78, 347-363. 10.1016/j.pneurobio.2006.03.006.

638 Raivich, G., Bohatschek, M., Da Costa, C., Iwata, O., Galiano, M., Hristova, M., Nateri, A.S., Makwana,  
639 M., Riera-Sans, L., Wolfer, D.P., et al. (2004). The AP-1 transcription factor c-Jun is required for efficient  
640 axonal regeneration. *Neuron* 43, 57-67. 10.1016/j.neuron.2004.06.005.

641 Sakai, M., Okuda, A., Hatayama, I., Sato, K., Nishi, S., and Muramatsu, M. (1989). Structure and  
642 expression of the rat c-jun messenger RNA: tissue distribution and increase during chemical  
643 hepatocarcinogenesis. *Cancer research* 49, 5633-5637.

644 Sohn, J.W., Elmquist, J.K., and Williams, K.W. (2013). Neuronal circuits that regulate feeding behavior  
645 and metabolism. *Trends Neurosci* 36, 504-512. 10.1016/j.tins.2013.05.003.

646 Tian, Y., Xu, J., Li, Y., Zhao, R., Du, S., Lv, C., Wu, W., Liu, R., Sheng, X., Song, Y., et al. (2019). MicroRNA-  
647 31 Reduces Inflammatory Signaling and Promotes Regeneration in Colon Epithelium, and Delivery of  
648 Mimics in Microspheres Reduces Colitis in Mice. *Gastroenterology* 156, 2281-2296 e2286.  
649 10.1053/j.gastro.2019.02.023.

650 Wang, Y.H., Li, J.Q., Shi, J.F., Que, J.Y., Liu, J.J., Lappin, J.M., Leung, J., Ravindran, A.V., Chen, W.Q., Qiao,  
651 Y.L., et al. (2020). Depression and anxiety in relation to cancer incidence and mortality: a systematic  
652 review and meta-analysis of cohort studies. *Molecular psychiatry* 25, 1487-1499. 10.1038/s41380-019-  
653 0595-x.

654 Wisdom, R., Johnson, R.S., and Moore, C. (1999). c-Jun regulates cell cycle progression and apoptosis

655 by distinct mechanisms. *The EMBO journal* *18*, 188-197. [10.1093/emboj/18.1.188](https://doi.org/10.1093/emboj/18.1.188).  
656 Wu, W., Sun, M., Zhang, H.P., Chen, T., Wu, R., Liu, C., Yang, G., Geng, X.R., Feng, B.S., Liu, Z., et al.  
657 (2014). Prolactin mediates psychological stress-induced dysfunction of regulatory T cells to facilitate  
658 intestinal inflammation. *Gut* *63*, 1883-1892. [10.1136/gutjnl-2013-306083](https://doi.org/10.1136/gutjnl-2013-306083).  
659 Xia, G., Han, Y., Meng, F., He, Y., Srisai, D., Farias, M., Dang, M., Palmiter, R.D., Xu, Y., and Wu, Q.  
660 (2021). Reciprocal control of obesity and anxiety-depressive disorder via a GABA and serotonin neural  
661 circuit. *Molecular psychiatry*. [10.1038/s41380-021-01053-w](https://doi.org/10.1038/s41380-021-01053-w).  
662 Yuan, F., Jiang, H., Yin, H., Jiang, X., Jiao, F., Chen, S., Ying, H., Chen, Y., Zhai, Q., and Guo, F. (2020).  
663 Activation of GCN2/ATF4 signals in amygdalar PKC-delta neurons promotes WAT browning under  
664 leucine deprivation. *Nature communications* *11*, 2847. [10.1038/s41467-020-16662-2](https://doi.org/10.1038/s41467-020-16662-2).  
665 Zhu, P., Bowden, P., Zhang, D., and Marshall, J.G. (2011). Mass spectrometry of peptides and proteins  
666 from human blood. *Mass Spectrom Rev* *30*, 685-732. [10.1002/mas.20291](https://doi.org/10.1002/mas.20291).

667

668

669

670

671

672

673

674

675

676

677

678

679

680

681

682

683

## 684 **Figure legends**

685 **Figure 1.** Activation of AgRP neurons reverses CRS-induced anxiety behaviors and  
686 colitis. (A) Representative tracks and statistical results in OF test. (B) Representative  
687 tracks and statistics in EPM test. (C) Percentage of body weight loss. (D) Scores of  
688 diarrhea. (E) Gross morphology and length of the colon. (F) H&E staining and  
689 histological scores of the colon tissues. Scale bar, 110  $\mu\text{m}$ . (G) qRT-PCR analysis of  
690 mRNA expression of inflammatory cytokines (*Il6*, *Il1b*, *Il12*, and *Tgfb*) in the distal  
691 colon tissues. Studies for A-B were conducted using 10- to 12-week-old AgRP-Cre  
692 mice receiving AAV expressing mCherry (- hM3Dq) or hM3Dq (+ hM3Dq), all mice  
693 experienced unstressed (- CRS) or stressed (+ CRS) treatment for 14 days. Behavioral  
694 tests were performed 30 min after single CNO injection on day 15 (A) and day 16 (B).  
695 C-G were performed using - hM3Dq mice and + hM3Dq mice under treatment of 3%  
696 DSS in drinking water for 7 days to induce acute colitis with (+ CRS) or without (-  
697 CRS) stress, simultaneously receiving CNO injections every 12 hours per day. Values  
698 are expressed as means  $\pm$  SEM (n = 5-8 per group), with individual data points. Data  
699 were analyzed using two-way analysis of variance, followed by Tukey's multiple  
700 comparisons test. - hM3Dq + CRS versus - hM3Dq - CRS, \*P <0.05, \*\*P <0.01; +  
701 hM3Dq + CRS versus - hM3Dq + CRS, #P <0.05, ##P <0.01 (C-D).

702

703 **Figure 2.** Inhibition of AgRP neurons mimics CRS-increased susceptibility to anxiety  
704 and colitis. (A) Representative tracks and statistical results in OF test. (B)

705 Representative tracks and statistics in EPM test. (C) Percentage of body weight loss.  
706 (D) Scores of diarrhea. (E) Gross morphology and length of the colon. (F) H&E  
707 staining and histological scores of the colon tissues. Scale bar, 110  $\mu$ m. (G) qRT-PCR  
708 analysis of mRNA expression of inflammatory cytokines (*Il6*, *Il1b*, *Il12*, and *Tgfb*) in  
709 the distal colon tissues. Studies for A-B were conducted using 10- to 12-week-old  
710 AgRP-Cre mice receiving AAV expressing mCherry (- hM4Di) or hM4Di (+ hM4Di),  
711 all mice received CNO injections every 12 h per day. Behavioral tests were performed  
712 30 min after single CNO injection on day 22 (A) and day 23 (B). C-G were performed  
713 using - hM4Di mice and + hM4Di mice with 3% DSS in drinking water for 7 days to  
714 induce acute colitis after 21 days of CNO injections. Values are expressed as means  $\pm$   
715 SEM (n = 8-10 per group), with individual data points. Data were analyzed using two-  
716 tailed unpaired Student's *t* test.

717

718 **Figure 3.** Deletion of c-Jun in AgRP neurons facilitates anxiety-like behaviors and  
719 colitis. (A) Representative tracks and statistical results in OF test. (B) Representative  
720 tracks and statistics in EPM test. (C) Percentage of body weight loss. (D) Scores of  
721 diarrhea. (E) Gross morphology and length of the colon. (F) H&E staining and  
722 histological scores of the colon tissues. Scale bar, 110  $\mu$ m. (G) qRT-PCR analysis of  
723 mRNA expression of inflammatory cytokines (*Il6*, *Il1b*, *Il12*, and *Tgfb*) in the distal  
724 colonic tissues. Studies for A-B were conducted using 20- to 22-week-old control  
725 mice (*c-Jun*<sup>loxp/loxp</sup>) or mice with c-Jun deletion in AgRP neurons (*c-Jun* <sup>$\Delta$ AgRP</sup>). C-G  
726 were performed in *c-Jun*<sup>loxp/loxp</sup> and *c-Jun* <sup>$\Delta$ AgRP</sup> mice administrated with (+ DSS) or

727 without (- DSS) 3% DSS for 6 days to induce acute colitis. Values are expressed as  
728 means  $\pm$  SEM (n = 4-12 per group), with individual data points. Data were analyzed  
729 using two-way analysis of variance, followed by Tukey's multiple comparisons test.  
730 *c-Jun*<sup>loxp/loxp</sup> + DSS versus *c-Jun*<sup>loxp/loxp</sup> - DSS, \*P < 0.05, \*\*P < 0.01. *c-Jun* <sup>$\Delta$ AgRP</sup> + DSS  
731 versus *c-Jun*<sup>loxp/loxp</sup> + DSS, #P < 0.05, ##P < 0.01 (C-D).

732

733 **Figure 4.** Relieving anxiety with cyamemazine (CYA) reverses colitis in *c-Jun* <sup>$\Delta$ AgRP</sup>  
734 mice. (A) Representative tracks and statistical results in OF test. (B) Representative  
735 tracks and statistics in EPM test. (C) Percentage of body weight loss. (D) Scores of  
736 diarrhea. (E) Gross morphology and length of the colon. (F) H&E staining and  
737 histological scores of the colon tissues. Scale bar, 110  $\mu$ m. (G) qRT-PCR analysis of  
738 mRNA expression of inflammatory cytokines (*Il6*, *Il1b*, *Il12*, and *Tgfb*) in the distal  
739 colonic tissues. Studies for A-B were conducted using 18- to 20-week-old *c-Jun*<sup>loxp/loxp</sup>  
740 mice and *c-Jun* <sup>$\Delta$ AgRP</sup> mice treated with (+ CYA) or without (- CYA) CYA for 7 days.  
741 Behavioral tests were performed 30 min after single CYA injection on day 8 (A) and  
742 day 9 (B). C-G were performed in *c-Jun*<sup>loxp/loxp</sup> and *c-Jun* <sup>$\Delta$ AgRP</sup> mice administrated  
743 with 3% DSS for 5 days to induce acute colitis with (+ CYA) or without (- CYA) CYA.  
744 Values are expressed as means  $\pm$  SEM (n = 6-10 per group), with individual data  
745 points. Data were analyzed using two-way analysis of variance, followed by Tukey's  
746 multiple comparisons test. *c-Jun* <sup>$\Delta$ AgRP</sup> - CYA versus *c-Jun*<sup>loxp/loxp</sup> - CYA, \*P < 0.05, \*\*P  
747 < 0.01. *c-Jun* <sup>$\Delta$ AgRP</sup> + CYA versus *c-Jun* <sup>$\Delta$ AgRP</sup> - CYA, #P < 0.05, ##P < 0.01 (C-D).

748

749 **Figure 5.** The increased colitis susceptibility in *c-Jun*<sup>ΔAgRP</sup> mice is mediated by  
750 THBS1. (A) Partial least-squares discriminant analysis of protein composition. (B)  
751 Spearman's correlation analysis of serum proteome. (C) Serum thbs1 levels. (D)  
752 Percentage of body weight loss. (E) Scores of diarrhea. (F) Gross morphology and  
753 length of the colon. (G) H&E staining and histological scores of the colon tissues.  
754 Scale bar, 110 μm. Scale bar, 110 μm. (H) qRT-PCR analysis of mRNA expression of  
755 inflammatory cytokines (*Il6*, *Il1b*, *Il12*, and *Tgfb*) in the distal colonic tissues. (I)  
756 Summary Diagram. Chronic restraint stress induces anxiety-like behaviors and colitis  
757 susceptibility, which is mediated by c-Jun in AgRP neurons. Knockdown of c-Jun in  
758 AgRP neurons decreases AgRP neurons activity and increases anxiety-like behaviors  
759 and colitis susceptibility through reducing serum THBS1 levels. Studies for A-B were  
760 conducted using - c-Jun - CRS mice, - c-Jun + CRS mice and + c-Jun + CRS mice  
761 with 3% DSS for 7 days. Serum was collected after DSS stimulation for proteomics  
762 profiling. C was conducted using 24- to 26-week-old *c-Jun*<sup>loxp/loxp</sup> mice and *c-Jun*<sup>ΔAgRP</sup>  
763 mice with DSS administration. D-H were conducted using 22- to 24-week-old *c-*  
764 *Jun*<sup>loxp/loxp</sup> mice and *c-Jun*<sup>ΔAgRP</sup> mice with (+ thbs1) or without (- thbs1) thbs1  
765 supplementary, simultaneously receiving 3% DSS treatment for 6 days to induce acute  
766 colitis. Values are expressed as means ± SEM (n=3-9 per group), with individual data  
767 points. Data were analyzed using two-way analysis of variance, followed by Tukey's  
768 multiple comparisons test. *c-Jun*<sup>ΔAgRP</sup> - thbs1 versus *c-Jun*<sup>loxp/loxp</sup> - thbs1, \*P <0.05,  
769 \*\*P <0.01; *c-Jun*<sup>ΔAgRP</sup> + thbs1 versus *c-Jun*<sup>ΔAgRP</sup> - thbs1, #P <0.05, ###P <0.01 (D-E).

770



**Figure 1**

□ - hM3Dq - CRS    ■ - hM3Dq + CRS    ■ + hM3Dq - CRS    ■ + hM3Dq + CRS

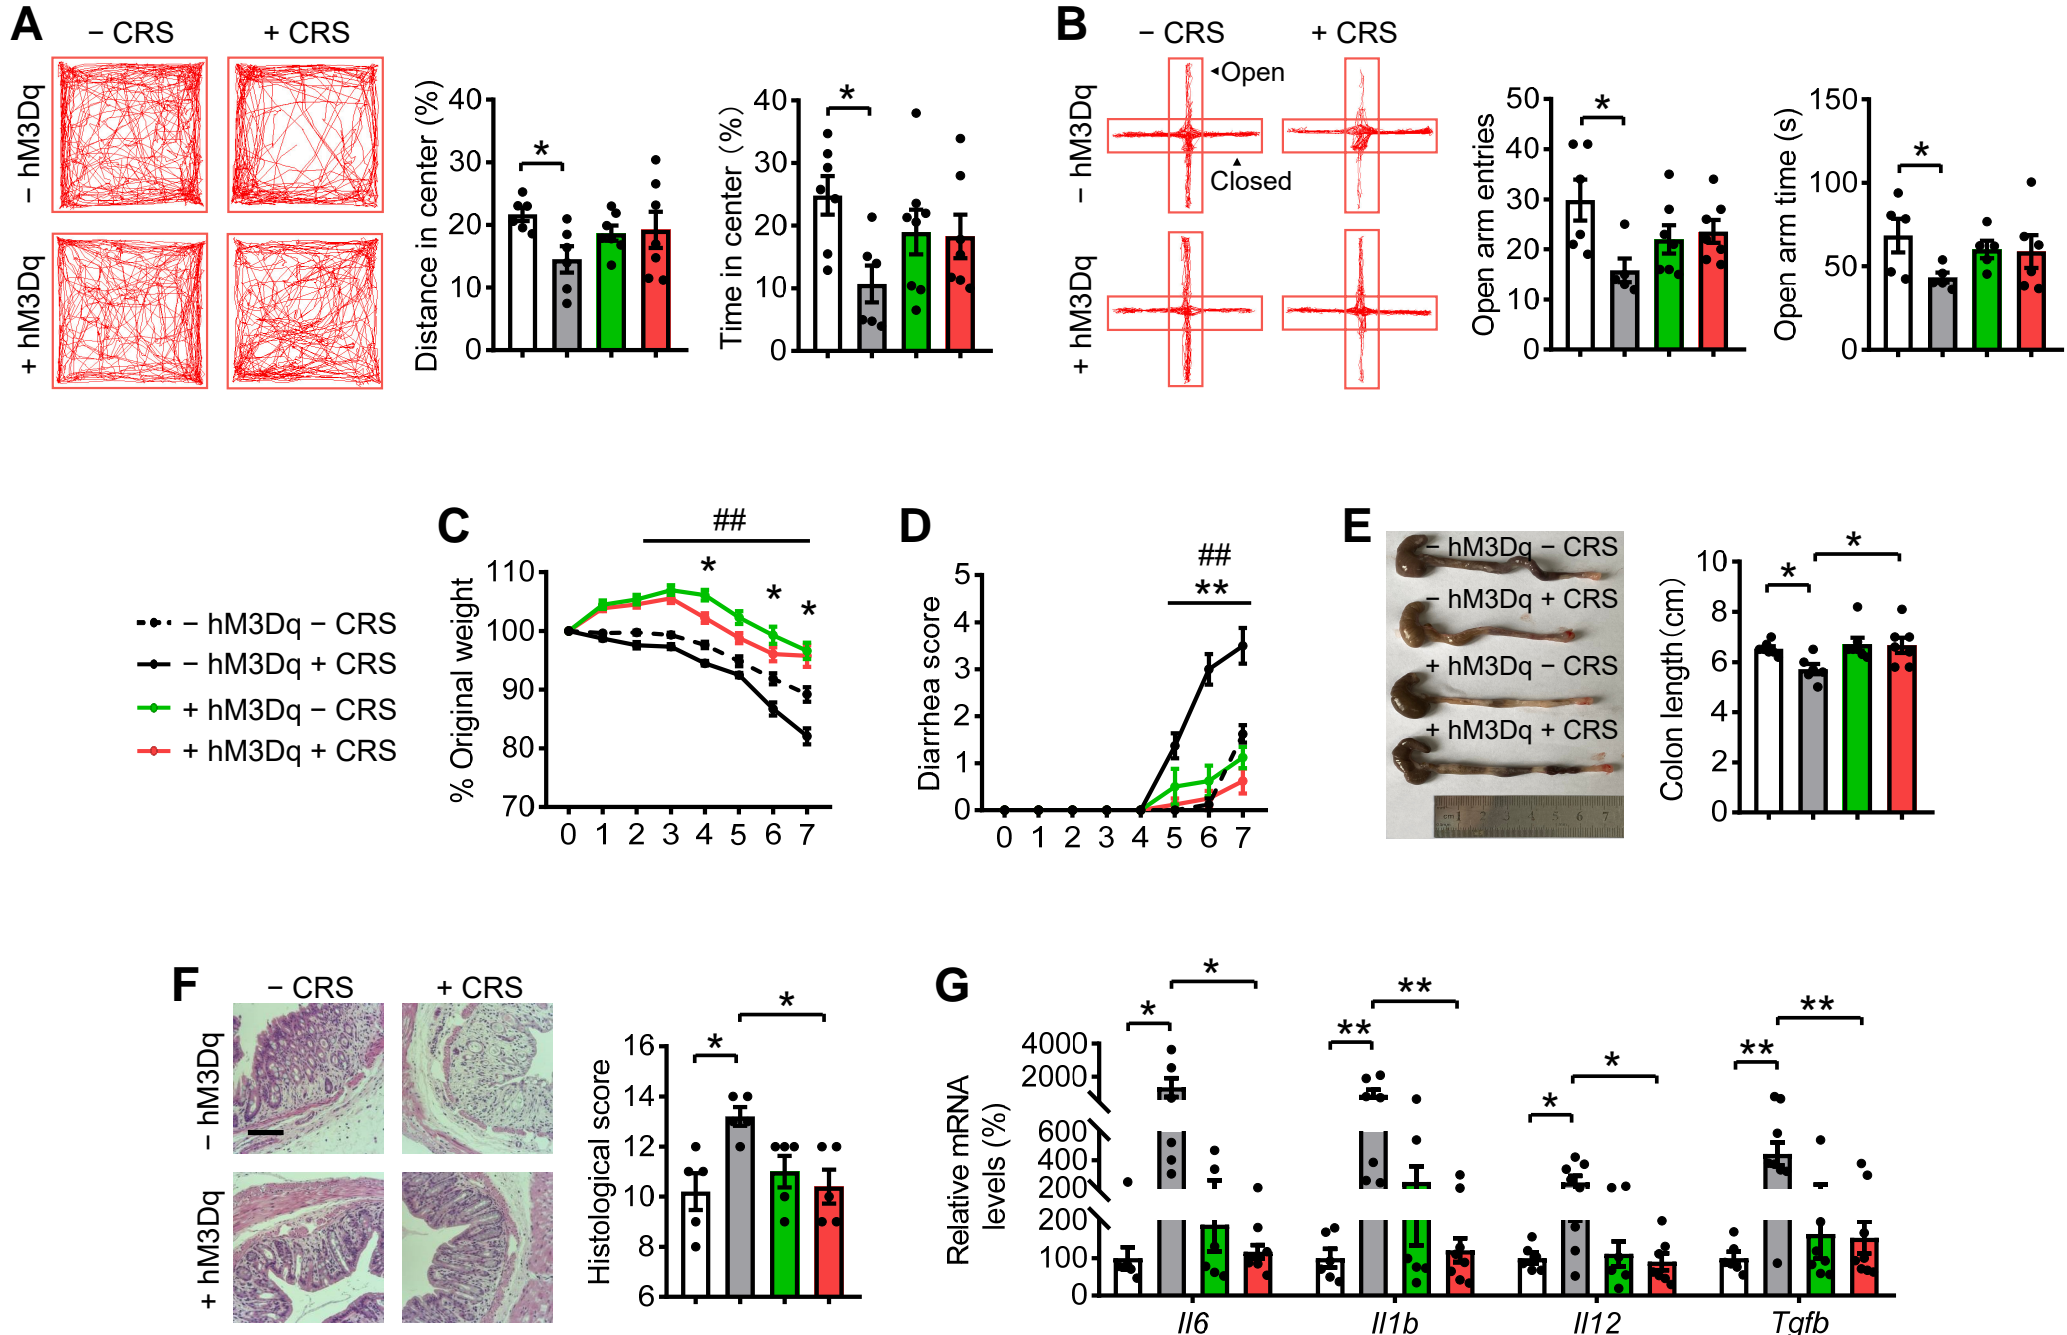

**Figure 2**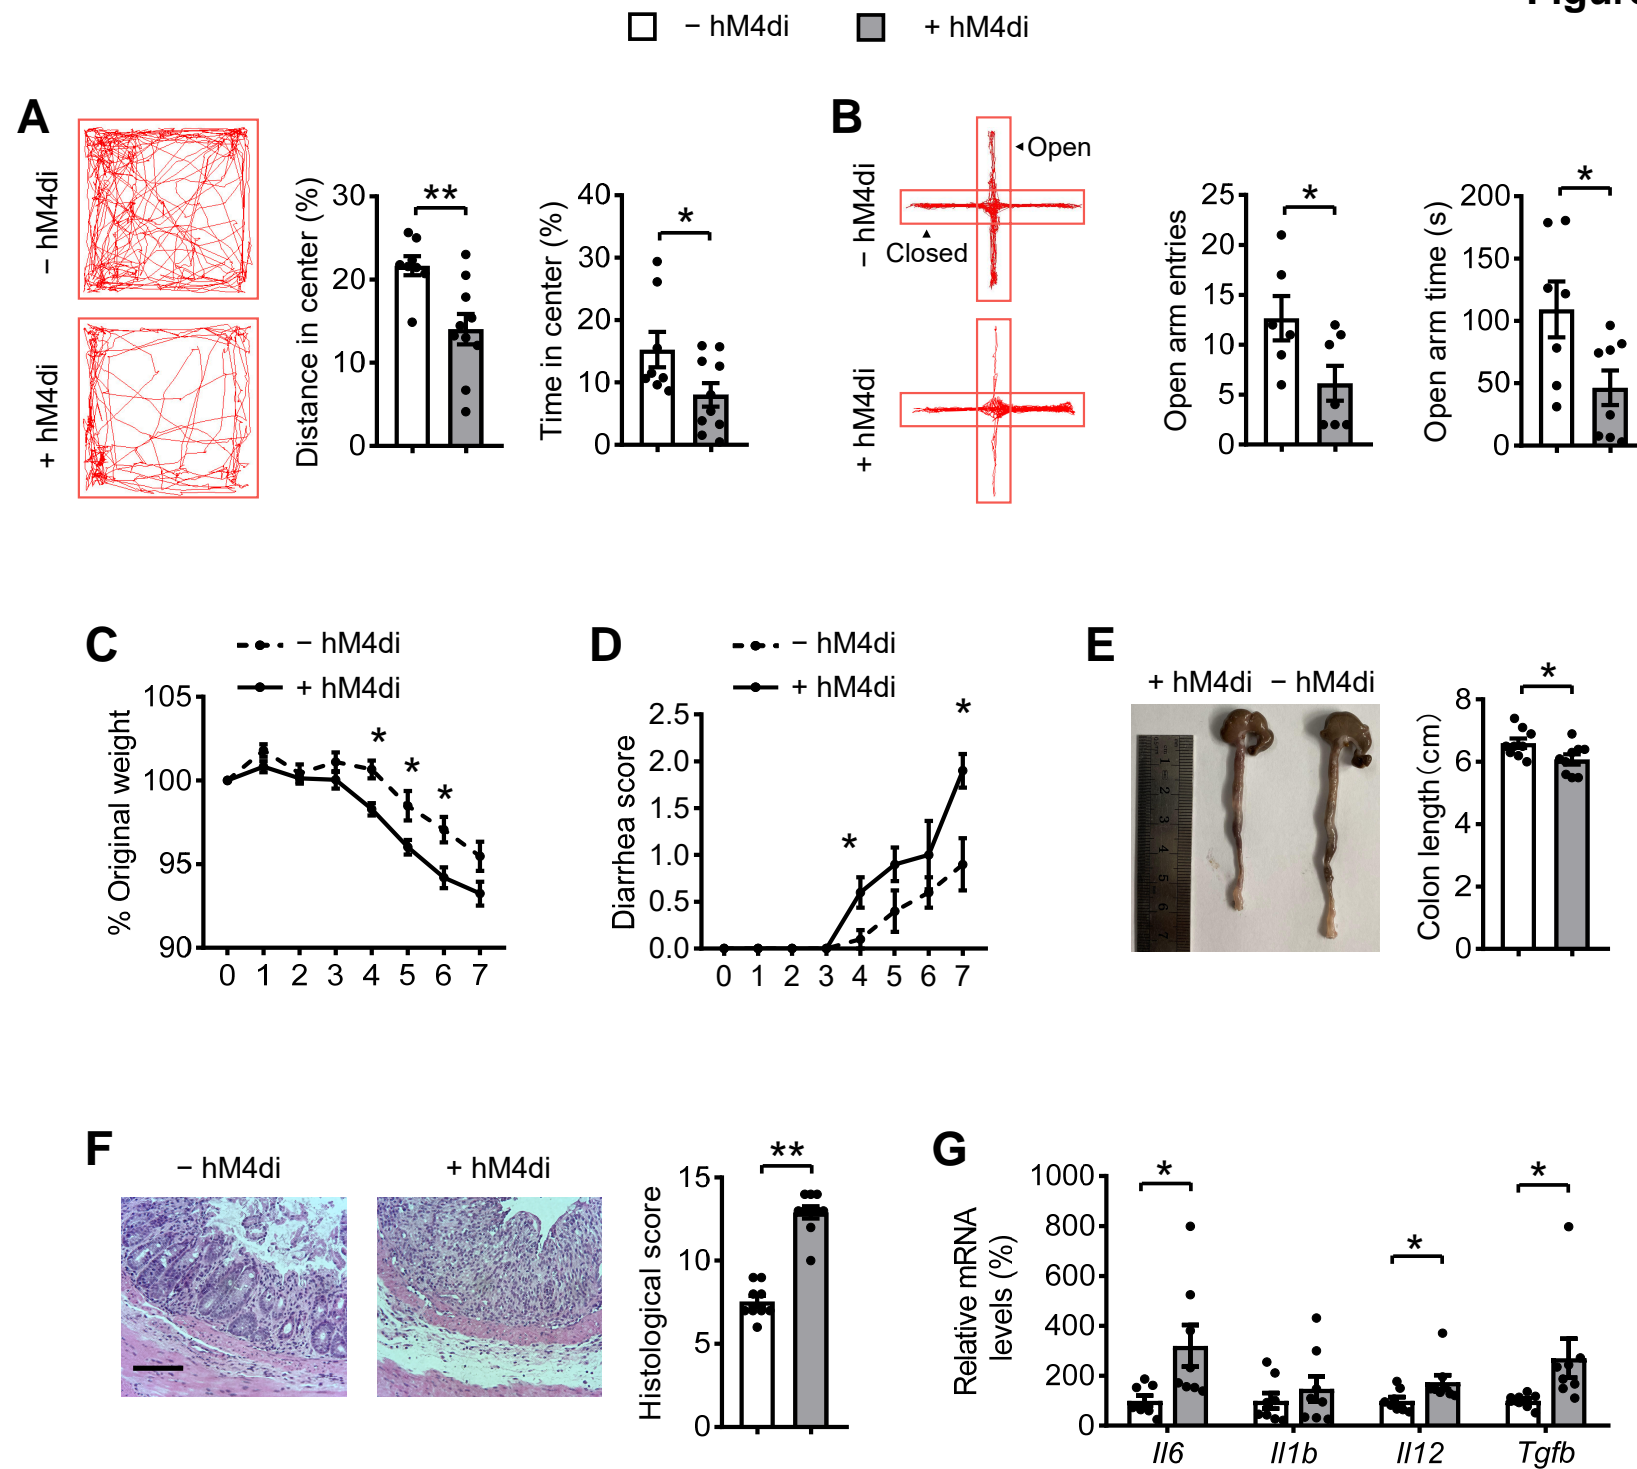

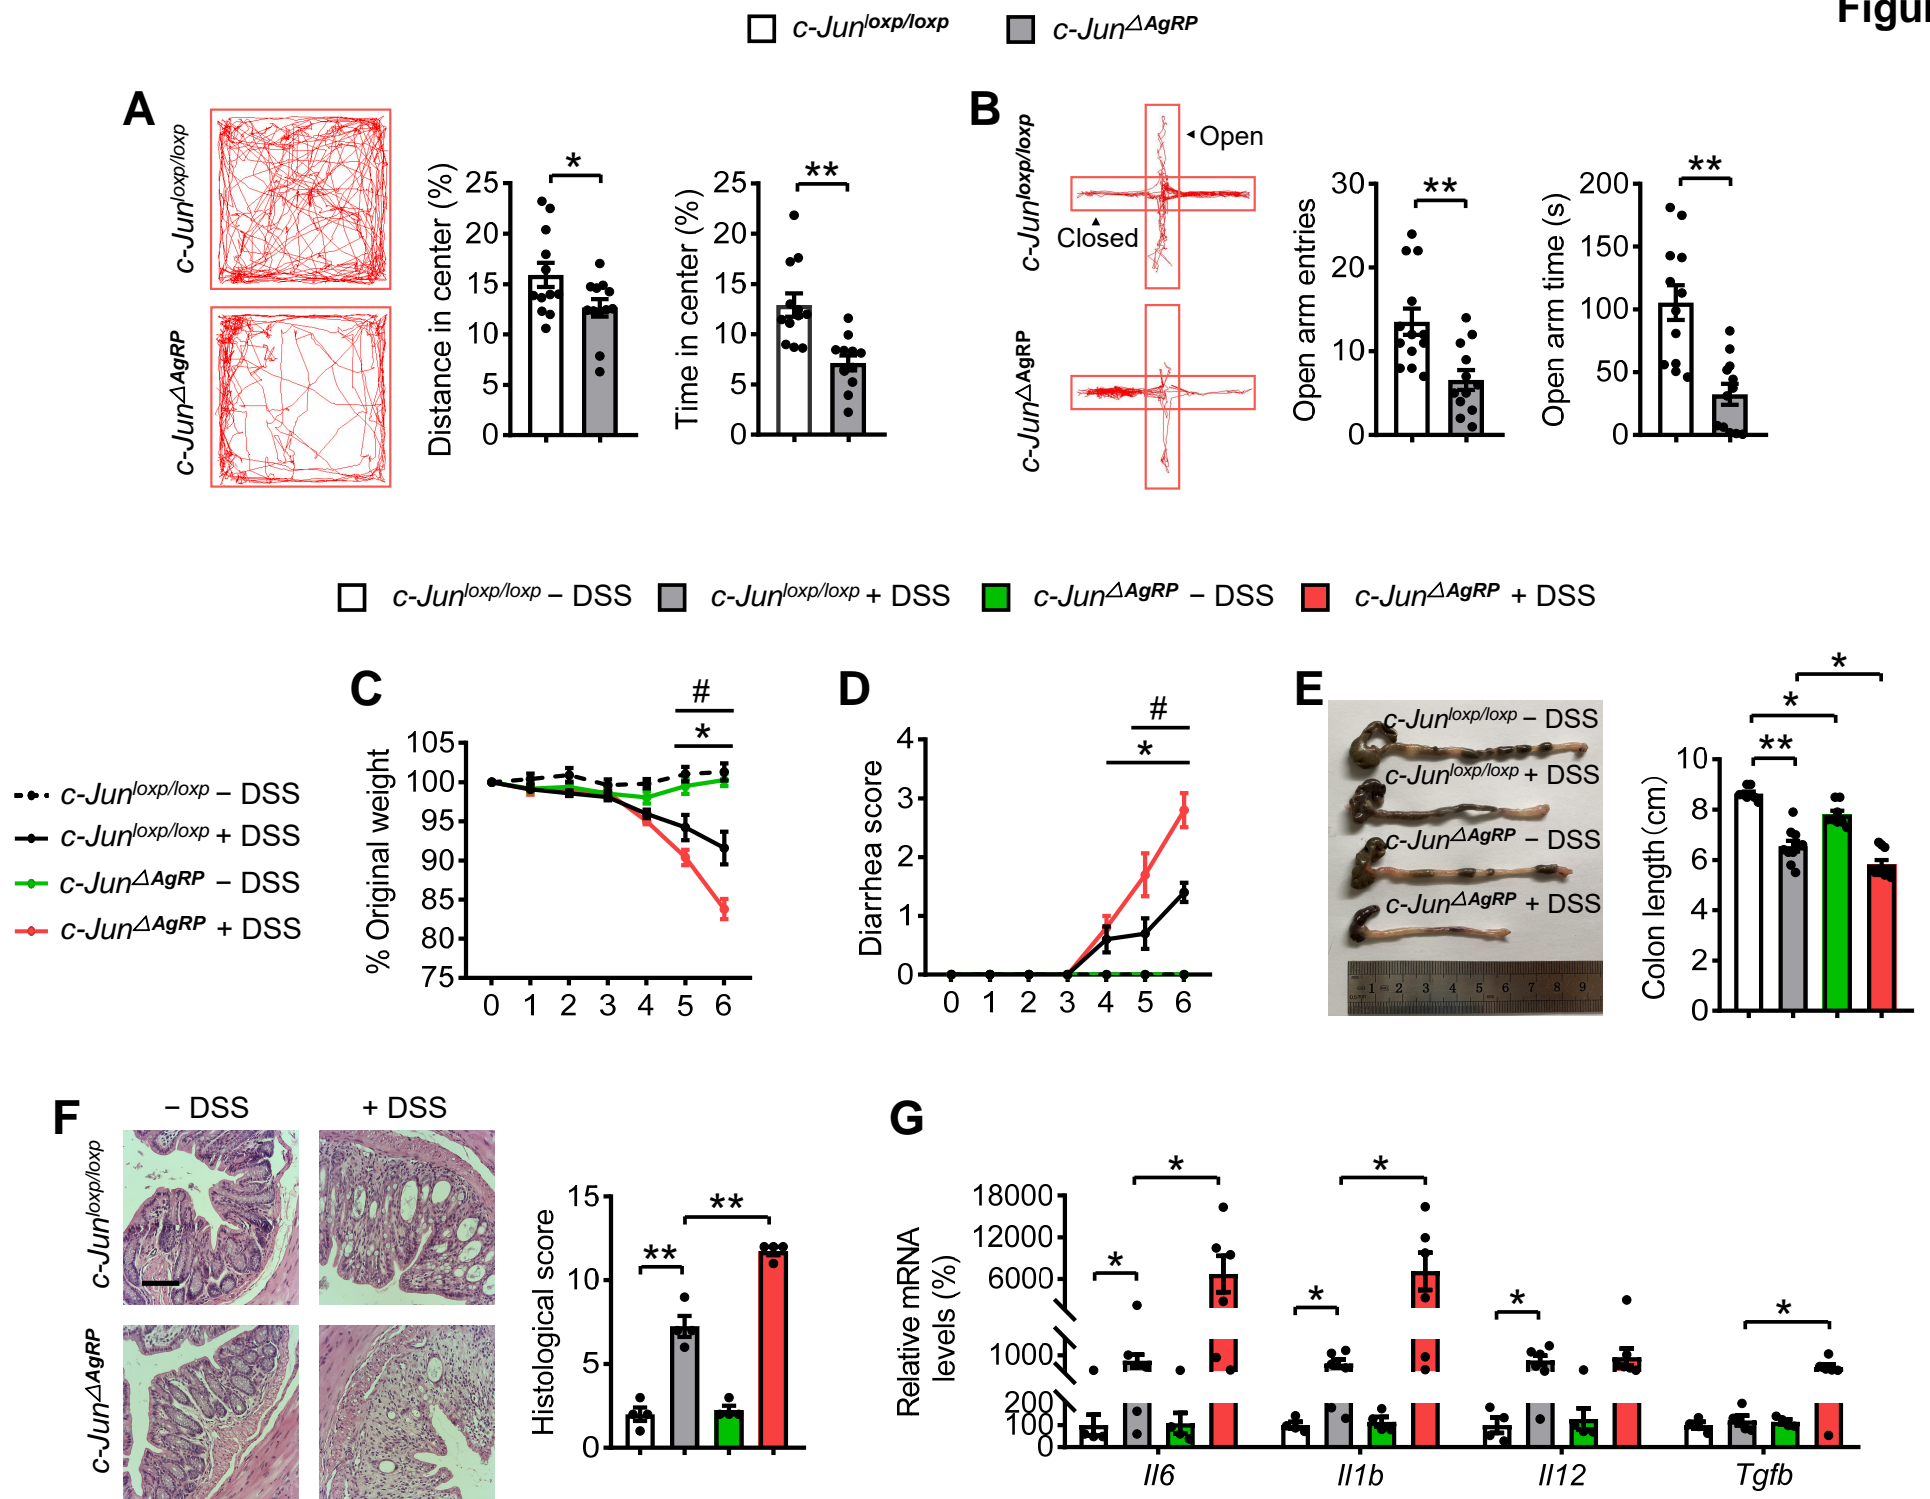

**Figure 4**

□ *c-Jun<sup>loxp/loxp</sup> - CYA*    ■ *c-Jun<sup>loxp/loxp</sup> + CYA*    ■ *c-Jun<sup>ΔAgRP</sup> - CYA*    ■ *c-Jun<sup>ΔAgRP</sup> + CYA*

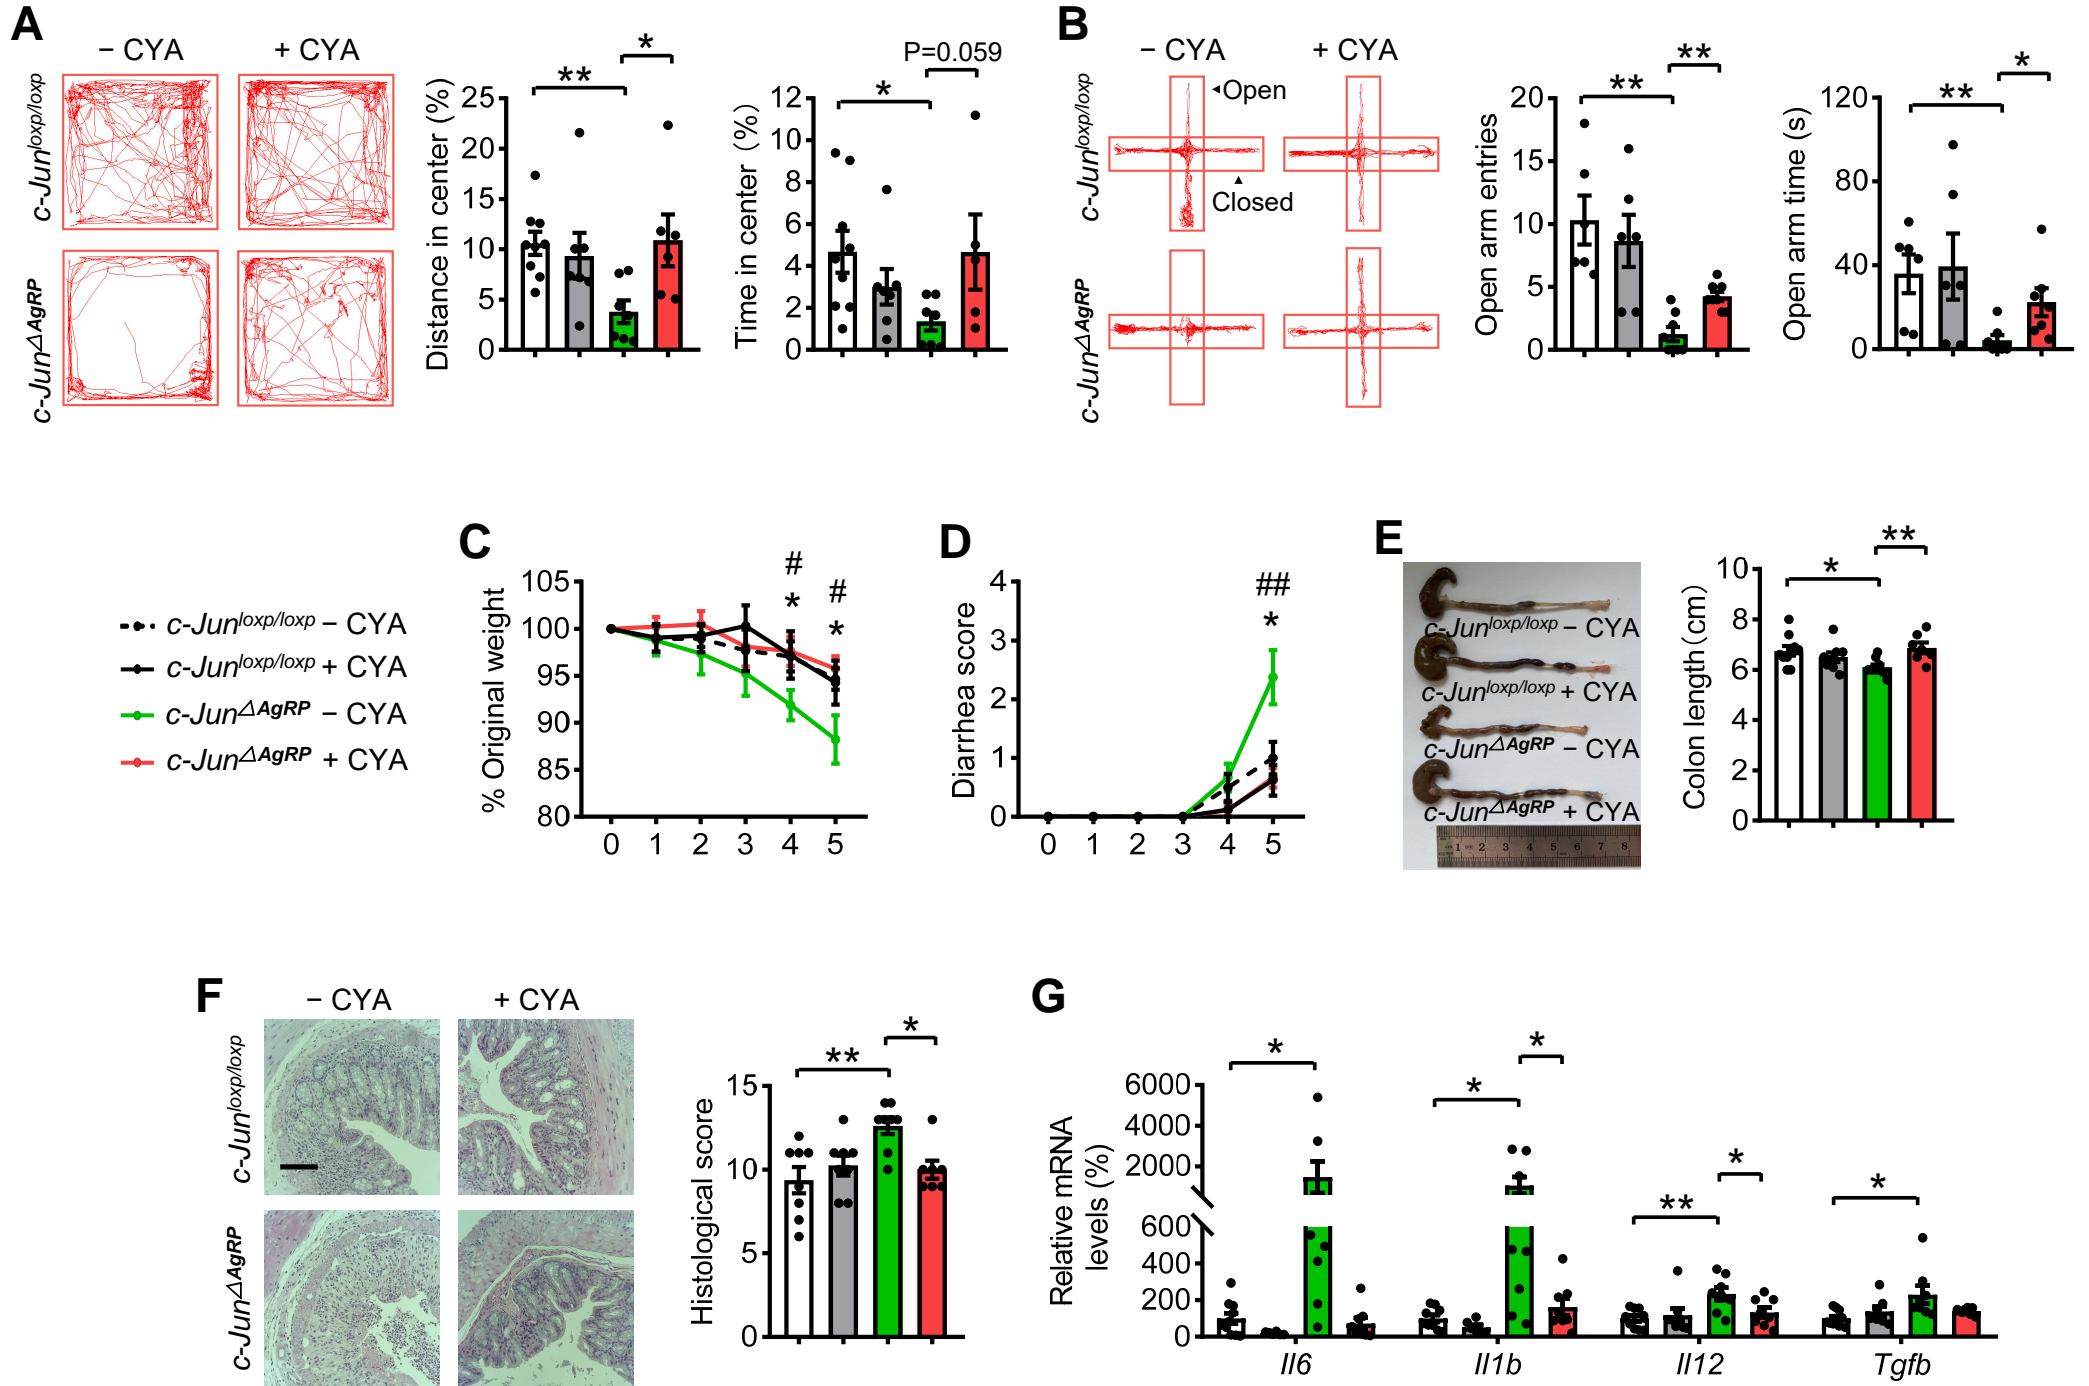

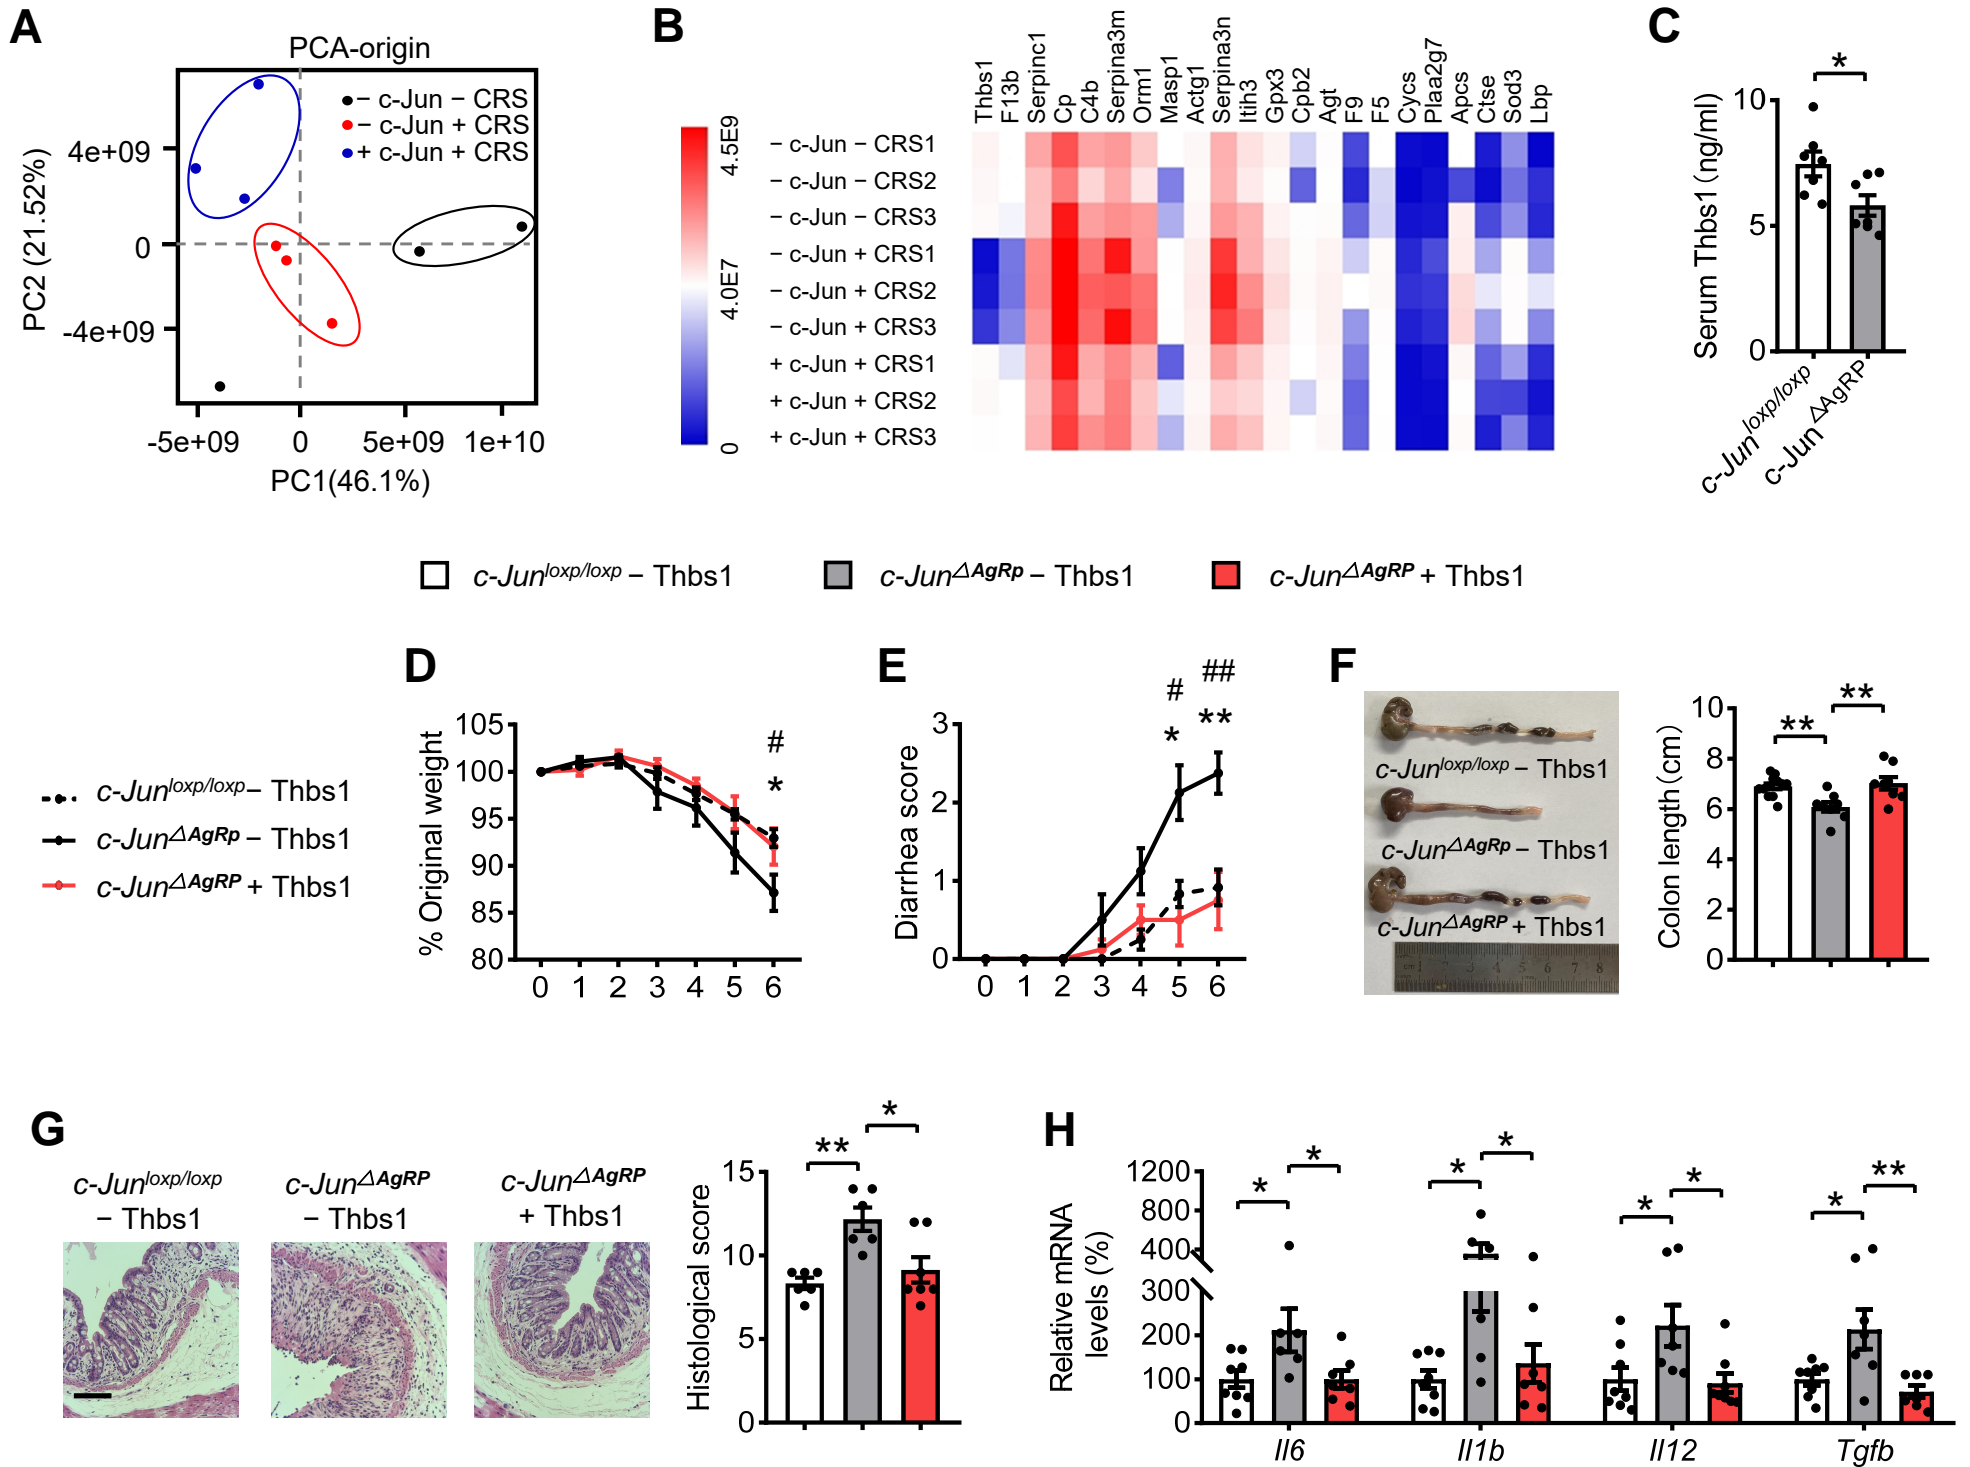

I

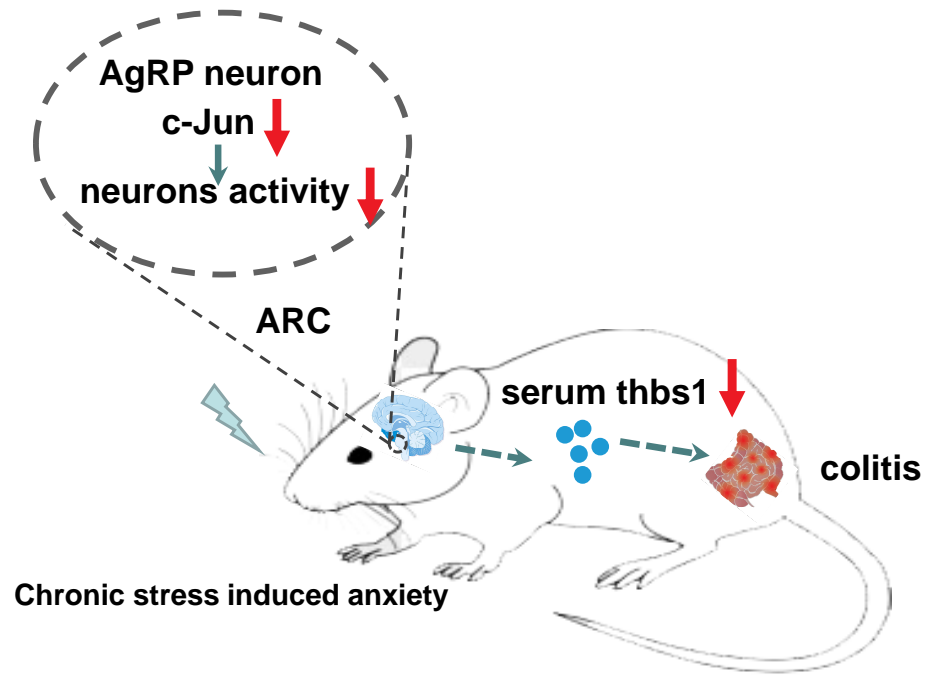

## Supplementary Figures and Figure Legends

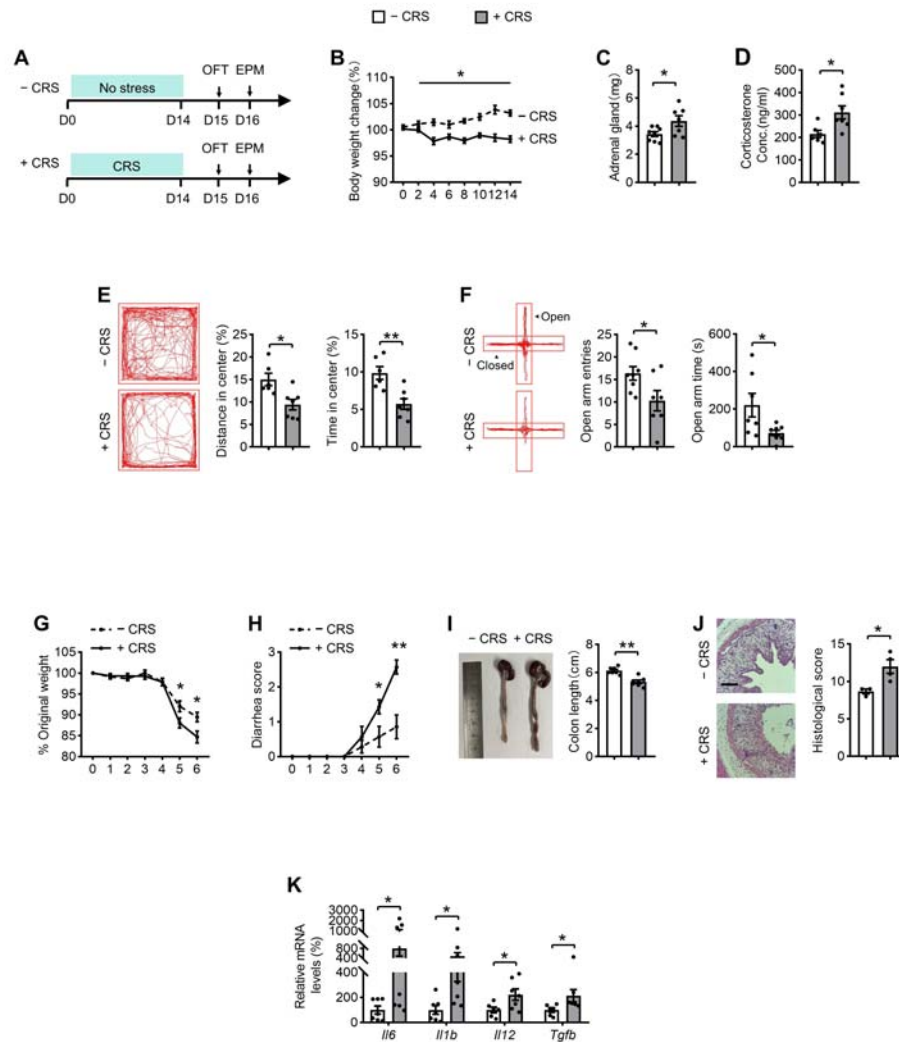

**Supplementary Figure 1.** Chronic restraint stress (CRS) induces anxiety-like behaviors and increases the susceptibility to colitis. (A) Schematic showing the CRS experimental protocol. (B) Changes of body weight. (C) Adrenal gland weights. (D) Serum corticosterone levels. (E) Representative tracks and statistical results in OF test. (F) Representative tracks and statistics in EPM test. (G) Percentage of body weight loss. (H) Scores of diarrhea. (I) Gross morphology and length of the colon. (J) H&E staining and histological scores of the colon tissues. Scale bar, 110  $\mu$ m. (K) qRT-PCR

analysis of mRNA expression of inflammatory cytokines (*Il6*, *Il1b*, *Il12*, and *Tgfb*) in the distal colon tissues. Studies for A-F were conducted using 12-week-old WT mice with unstress (- CRS) or stressed (+ CRS) treatment for 14 days. Behavioral tests were performed on day 15 (E) and day 16 (F). G-K were conducted using - CRS mice and + CRS mice with 3% DSS in drinking water for 6 days to induce acute colitis; Values are expressed as means  $\pm$  SEM (n = 3–8 per group), with individual data points. Data were analyzed using two-tailed unpaired Student's *t* test.

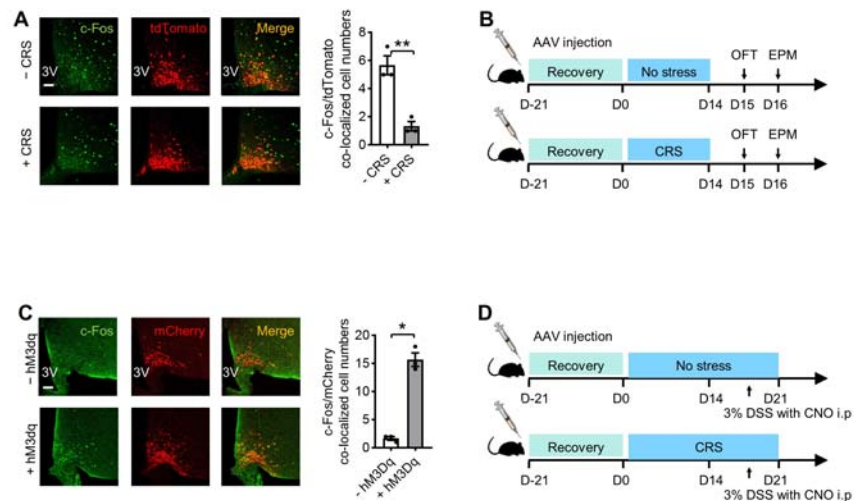

**Supplementary Figure 2.** Parameters related to mice with activation of AgRP neuronal activity. (A) Immunofluorescence (IF) staining for tdTomato (red), c-Fos (green), and merge (yellow) in the ARC sections (left), and quantification of c-Fos and tdTomato co-localized cell numbers (right). Scale bar, 50  $\mu$ m. c-Fos staining was coupled with a TSA Plus Fluorescein KIT. (B) Experimental timeline for CRS. (C) IF staining for mCherry (red), c-Fos (green) and merge (yellow) in ARC sections (left), and quantification of c-Fos and mCherry colocalized cell numbers (right). (D) Experimental timeline for DSS administration. Study for A was conducted using



14-week-old AgRP-Cre-Ai9 mice with (+ CRS) or without (- CRS) 14 days of stress.

C was conducted using 10- to 12-week-old AgRP-Cre mice receiving AAV expressing mCherry (- hM3Dq) or hM3Dq (+ hM3Dq), both treated with one injection of CNO and 30 min later for immunofluorescence analysis. Values are expressed as means  $\pm$  SEM (n = 3-4 per group), with individual data points. Data were analyzed using two-tailed unpaired Student's *t* test.

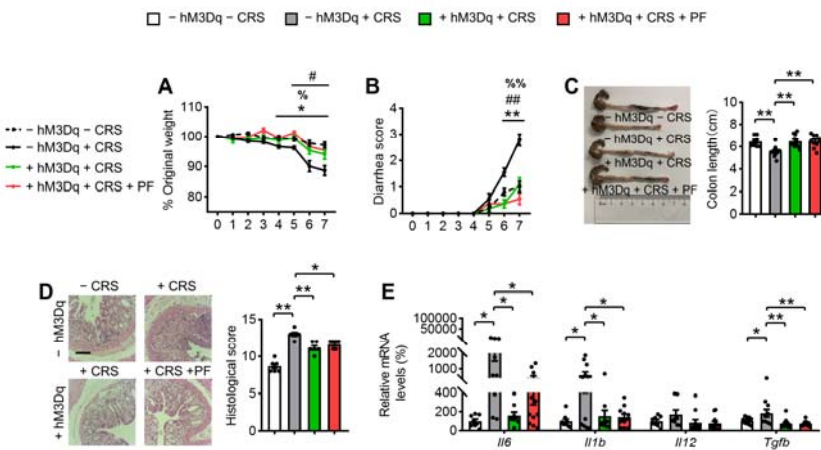

**Supplementary Figure 3** Pair-feeding has no beneficial effect on the improvement of colitis. (A) Percentage of body weight loss. (B) Scores of diarrhea. (C) Gross morphology and length of the colon. (D) H&E staining and histological scores of the colon tissues. Scale bar, 110  $\mu$ m. (E) qRT-PCR analysis of mRNA expression of inflammatory cytokines (*Il16*, *Il1b*, *Il12*, and *Tgfb*) in the distal colonic tissues. Studies were conducted using 10- to 12-week-old AgRP-Cre mice receiving AAV expressing mCherry (- hM3Dq) or hM3Dq (+ hM3Dq), all mice experienced unstressed (- CRS) or stressed (+ CRS) treatment for 14 days, after that was under

treatment of 3% DSS in drinking water for 7 days to induce acute colitis, simultaneously receiving CNO injections every 12 hours per day. Pair-fed (PF) experiment was administered during CNO injection. For pair-fed groups (+ hM3Dq + CRS + PF), mice were given the same diet as the - hM3Dq + CRS groups. Values are expressed as means  $\pm$  SEM (n=6-11 per group), with individual data points. Data were analyzed using two-way ANOVA, followed by Tukey's multiple comparisons test. - hM3Dq + CRS versus - hM3Dq - CRS, \*P < 0.05, \*\*P < 0.01; + hM3Dq + CRS versus - hM3Dq + CRS, #P < 0.05, ##P < 0.01; + hM3Dq + CRS + PF versus - hM3Dq + CRS, %P < 0.05, %%P < 0.01 (A-B).

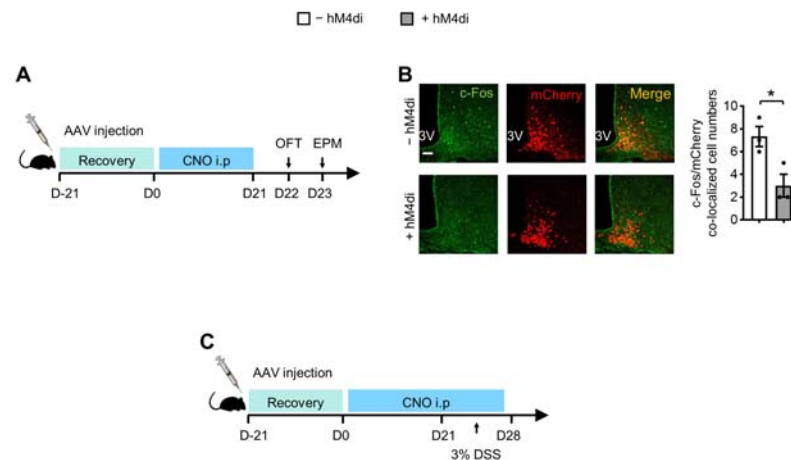

**Supplementary Figure 4.** Parameters related to mice with inhibition of AgRP neuronal activity. (A) Experimental timeline for CRS. (B) Immunofluorescence (IF) staining for mCherry (red), c-Fos (green) and merge (yellow) in ARC sections (left), and quantification of c-Fos and mCherry colocalized cell numbers (right). (C) Experimental timeline for DSS administration. Study for B was conducted using 10- to 12-week-old AgRP-Cre mice receiving AAV expressing mCherry (- hM4Di) or

hM4Di (+ hM4Di) both treated with one injection of CNO and 30 min later for immunofluorescence analysis. Values are expressed as means  $\pm$  SEM (n = 3 per group), with individual data points. Data were analyzed using two-tailed unpaired Student's *t* test.

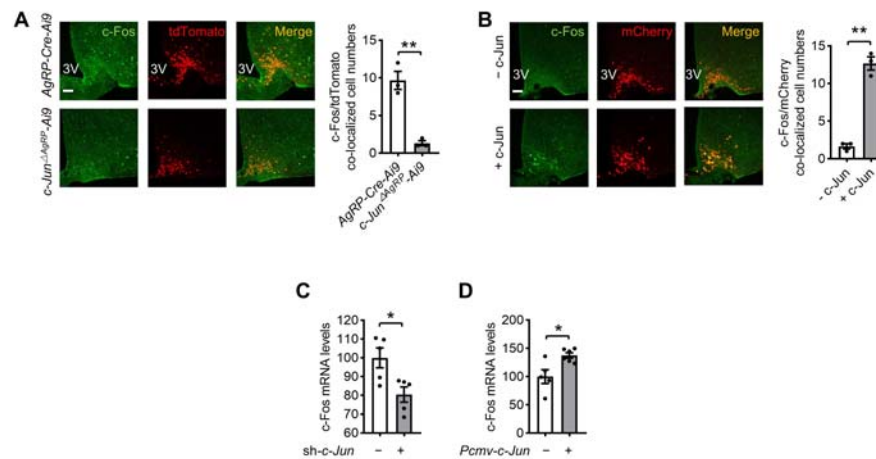

**Supplementary Figure 5.** The changes of c-Fos after c-Jun deletion and overexpression in vitro and in vivo. (A) IF staining for tdTomato (red), c-Fos (green) and merge (yellow) in ARC sections (left), and quantification of c-Fos and tdTomato colocalized cell numbers (right). (B) IF staining for mCherry (red), c-Fos (green) and merge (yellow) in ARC sections (left), and quantification of c-Fos and mCherry colocalized cell numbers (right). (C-D) C-Fos mRNA levels. Study for A was conducted by mating Ai9 (tdTomato) mice with AgRP-irs-Cre mice to obtain AgRP-Ai9 mice as controls, mating Ai9 (tdTomato) mice with mice with c-Jun deletion in AgRP neurons (*c-Jun*<sup>ΔAgRP</sup>) to obtain *c-Jun*<sup>ΔAgRP</sup>-Ai9 mice. B was conducted using 12- to 14-week-old AgRP-Cre mice receiving AAV expressing mCherry (- c-Jun) or c-Jun (+ c-Jun). C was conducted on primary hypothalamus

isolated from newborn mice, receiving control (-sh-*cJun*) or sh-*cJun* (+ sh-*cJun*) transfected with Lipo 3000. D was conducted on primary hypothalamus isolated from newborn mice, receiving control (- pcmv-*c-Jun*) or *c-Jun* (+ pcmv-*c-Jun*) transfected with Lipo 3000. Values are expressed as means  $\pm$  SEM (n=3-6 per group), with individual data points. Data were analyzed using two-tailed unpaired Student's *t* test.

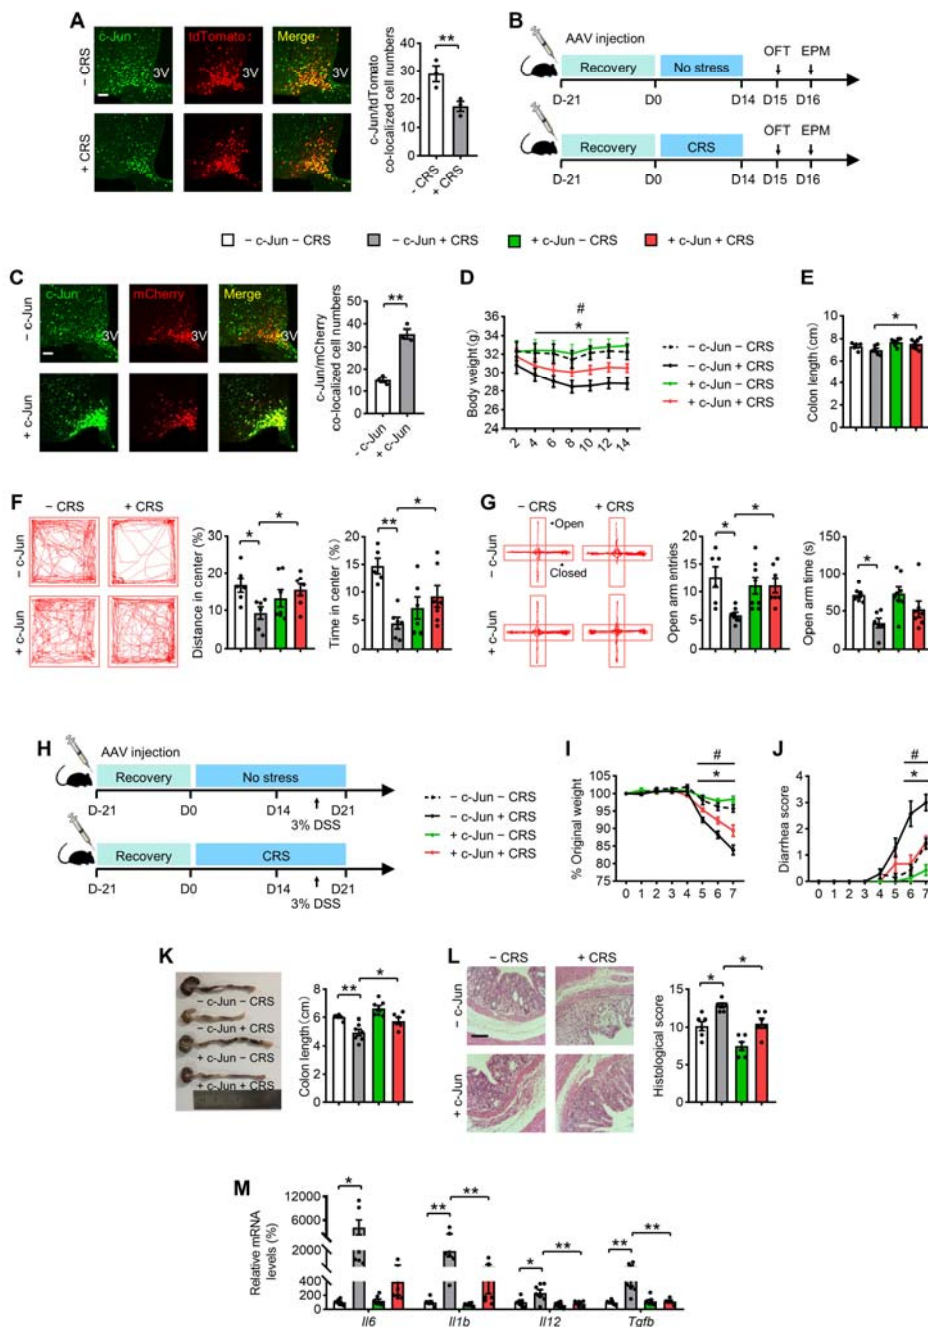

**Supplementary Figure 6.** Overexpression of c-Jun in AgRP neurons leads to resistance to CRS-induced anxiety-like behaviors and colitis. (A) IF staining for tdTomato (red), c-Jun (green) and merge (yellow) in ARC sections (left), and quantification of c-Jun and tdTomato colocalized cell numbers (right). (B) Experimental timeline for CRS. (C) IF staining for mCherry (red), c-Jun (green) and merge (yellow) in ARC sections (left), and quantification of c-Jun and mCherry colocalized cell numbers (right). (D) Body weight. (E) Colon length. (F) Representative tracks and statistical results in OF test. (G) Representative tracks and statistics in EPM test. (H) Experimental timeline for DSS administration. (I) Percentage of body weight loss. (J) Scores of diarrhea. (K) Gross morphology and length of the colon. (L) H&E staining and histological scores of the colon tissues. Scale bar, 110  $\mu$ m. (M) qRT-PCR analysis of mRNA expression of inflammatory cytokines (*Il16*, *Il1b*, *Il12*, and *Tgfb*) in the distal colonic tissues. Study for A was conducted using 14-week-old AgRP-Cre-Ai9 mice with (+ CRS) or without (- CRS) 14 days of stress. C was conducted using 12- to 14-week-old AgRP-Cre mice receiving AAV expressing mCherry (- c-Jun) or c-Jun (+ c-Jun), IF staining performed after 3 weeks from AAV recovery. D-G were conducted using - c-Jun mice and + c-Jun mice, both experienced unstressed (- CRS) or stressed (+ CRS) treatment for 14 days. Behavioral tests were performed on day 15 (F) and day 16 (G). H-M were conducted using - c-Jun mice and + c-Jun mice receiving 3% DSS in drinking water for 7 days to induce acute colitis, after stress (+ CRS) or unstress (- CRS). Values are expressed as means  $\pm$  SEM (n=3-8 per group), with individual data points. Data were

analyzed using two-tailed unpaired Student's *t* test (A, C). Data were analyzed using two-way ANOVA, followed by Tukey's multiple comparisons test (D-M). - *c-Jun* + CRS versus - *c-Jun* - CRS \**P* < 0.05, \*\**P* < 0.01. + *c-Jun* + CRS versus - *c-Jun* + CRS, #*P* < 0.05, ##*P* < 0.01 (D, I-J).

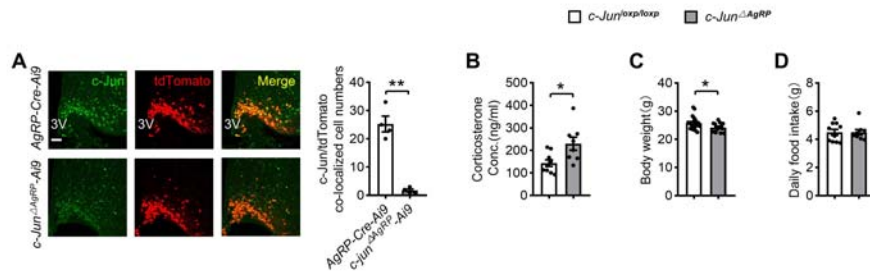

**Supplementary Figure 7.** Biochemical parameters related to *c-Jun<sup>ΔAgRP</sup>* mice. (A) IF staining of tdTomato (red), *c-Jun* (green) and merge (yellow) in ARC sections (left), and quantification of *c-Jun* and tdTomato colocalized cell numbers (right). (B) Serum corticosterone levels. (C) Body weight. (D) Food intake. Study for A was conducted using AgRP-Cre-Ai9 mice and *c-Jun<sup>ΔAgRP</sup>-Ai9* mice. B-D were conducted using *c-Jun<sup>loxp/loxp</sup>* mice or *c-Jun<sup>ΔAgRP</sup>* mice. Values are expressed as means ± SEM (n=4-20 per group), with individual data points. Data were analyzed using two-tailed unpaired Student's *t* test.

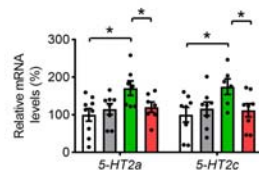

**Supplementary Figure 8.** The efficacy of anxiolytic drug cyamemazine (CYA).

mRNA levels of 5-HT2a and 5-HT2c. Study was conducted using 18- to 20-week-old *c-Jun*<sup>loxp/loxp</sup> mice and *c-Jun*<sup>ΔAgRP</sup> mice treated with (+ CYA) or without (- CYA) followed by DSS administration. Values are expressed as means ± SEM (n=6-9 per group), with individual data points. Data were analyzed using two-way ANOVA, followed by Tukey's multiple comparisons test.

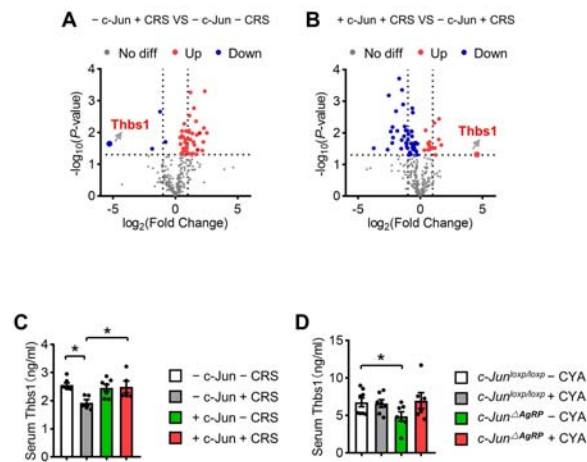

**Supplementary Figure 9.** Parameters related to *c-Jun*<sup>ΔAgRP</sup> mice with thbs1 supplementary. (A) Volcano plot of detected proteins between - c-Jun + CRS mice and - c-Jun - CRS after DSS insults; THBS1 is indicated. (B) Volcano plot of detected proteins between + c-Jun + CRS and - c-Jun + CRS after DSS insults; THBS1 is indicated. (C-D) Serum thbs1 levels. Studies for A-B were conducted using - c-Jun - CRS mice, - c-Jun + CRS mice and + c-Jun + CRS mice to analyze of serum secreted proteins. C was conducted using - c-Jun mice and + c-Jun mice receiving 3% DSS in drinking water for 7 days to induce acute colitis, after stress (+ CRS) or unstress (-

CRS). D was conducted using *c-Jun*<sup>loxp/loxp</sup> and *c-Jun*<sup>ΔAgRP</sup> mice administrated with 3% DSS for 5 days to induce acute colitis with (+ CYA) or without (- CYA) CYA. Values are expressed as means ± SEM (n=3-7 per group), with individual data points. Data were analyzed using two-tailed unpaired Student's *t* test (A-B). Data were analyzed using two-way ANOVA, followed by Tukey's multiple comparisons test (C-D).
